# Supplementary material for: Potential singlet fission chromophores of azulene-containing tetracene analogues: a theoretical study
Source: Royal Society of Chemistry journal article supplement (doi:10.1039/d3tc02689b), 2023-01-01
Supplement: d3tc02689b1.pdf [file d3tc02689b1.pdf]

*Electronic Supplementary Information for*

## **Potential singlet fission chromophores of azulene-containing tetracene analogue: a theoretical study**

Tianyu Li,<sup>a</sup> Li shen,<sup>\*,b</sup> Xianyuan Wang,<sup>a</sup> Xiaonan Fan,<sup>a</sup> Boce Cui,<sup>a</sup> Yanli Chen,<sup>a</sup>  
Bingchuan Yang,<sup>\*,c</sup> Heyuan Liu,<sup>\*,a</sup> Xiyou Li<sup>\*,a</sup>

<sup>a</sup> College of Chemistry and Chemical Engineering, School of Materials Science and Engineering, China University of Petroleum (East China), Qingdao, 266580, China.

<sup>b</sup> College of Chemical Engineering and Environmental Chemistry, Weifang University, Weifang, 261061, China.

<sup>c</sup> College of Chemistry and Chemical Engineering, Qilu Normal University, Shandong, 250013, China.

*To whom correspondence should be addressed: [shenliren93@wfu.edu.cn](mailto:shenliren93@wfu.edu.cn),  
[liuheyuan123@upc.edu.cn](mailto:liuheyuan123@upc.edu.cn), [xiyouli@upc.edu.cn](mailto:xiyouli@upc.edu.cn)*

## Contents

1. Comparisons of the vertical excitation energies calculated with different functionals (Fig. S1, Table S1-2).
2. Comparison of the excitation energies using the TDDFT with and without Tamm-Dancoff approximation (TDA) (Fig. S1, Table S3).
3. Solvation effects and basis set effect on  $E(S_1)_V$  and  $E(T_1)_V$  of model compounds (Fig. 1, Table S4-5).
4. Comparison of the adiabatic energies  $E(T_1)$  using the TDDFT with Tamm-Dancoff approximation (TDA) and UDFT (Table S6).
5. Effect of electronic coupling in [5]AzH dimers on  $E(S_1)_V$  and  $E(T_1)_V$  (Fig. S2, Table S7).
6. Hammett constant ( $\sigma_p$ ) of the introduced substituents (Table S8).
7. Difference electronic energy between open shell symmetry-broken singlet and closed-shell ( $\Delta E_{OS-CS}$ ), triplet-singlet gap ( $\Delta E_{T-OS}$ ) and spin contamination for the open shell singlet ( $\langle S^2 \rangle$ ) (Table S9).
8. HOMO, LUMO energies and HLG, DRC  $y_0$  and tetraradical character  $y_1$  (Table S10)
9. Vertical excitation energies ( $E(S_1)_V$  and  $E(T_1)_V$ ), oscillator strength, adiabatic excitation energies ( $E(S_1)$ ,  $E(T_1)$  and  $E(T_2)$ ) and the  $\Delta E_{SF}$  and  $\Delta E_{TTA}$  (Table S11).
10.  $N^{FOD}$  for all compounds considered in this work (Table S12).
11. Mulliken spin population of **B4a** (Fig. S3, Table S13).
12. Comparison of the vertical excitation energy of  $S_1$  with the energy at the CI point (Table S14).
13. Electron density distributions of HOMO and LUMO in azulene-containing analogues (**A0-B6**) (Fig. S4).
14. Comparison of DRC  $y_0$  and the  $N^{FOD}$  values for azulene-containing analogues (**A1-B6**), **B4a** and **B4b** derivatives and HLG versus DRC  $y_0$  for azulene-containing analogues (**A1-B6**) (Fig. S5).
15. Closed-shell and open-shell resonance structures of azulene-containing analogues (**A1-B6**) (Fig. S6).
16. Isocontour plots of OED and the FOD density (Fig. S7).
17. HLG,  $E(T_1)$  and  $\Delta E_{SF}$  for  $\alpha$  and  $\beta$  substituted **B4a** with respect to the DRC  $y_0$  (Fig. S8).

18. HLG for  $\alpha$  and  $\beta$  substituted **B4a** with respect to the  $E(T_1)$  (Fig. S9).
19.  $E(\text{HOMO})$ ,  $E(\text{LUMO})$ , HLG, DRC  $y_0$ ,  $E(S_1)$ ,  $E(T_1)$ , and  $\Delta E_{\text{SF}}$  for **B4b** derivatives (Fig S10).
20. Correlation between the vertical and adiabatic energies of  $S_1$ ,  $T_1$ , and the corresponding  $\Delta E_{\text{SF}}$  (**A1-B6**) (Fig S11).
21. Optimized geometries of **B4a** at different basis sets (Fig S12).
22. Coordinates of the geometries.

The vertical excitation energies of model compounds have been tested with and TDA method and different functionals. These functionals include B3LYP, CAM-B3LYP,  $\omega$ B97XD, M06-2X and tuned LC-BLYP. The solvation effects were evaluated by continuum model (PCM) with toluene, dichloromethane (DCM) and methanol (MeOH) used as solvents.<sup>1</sup> Compared to available experimental results, the functional CAM-B3LYP,  $\omega$ B97XD, M06-2X and tuned LC-BLYP overestimate  $E(S_1)_V$  (Table S1). The range separating parameters  $\mu$  were tuned for model molecules (Table S2) with Quantum program optDFTw<sup>2</sup>. The functional CAM-B3LYP and  $\omega$ B97XD show similar results and larger  $E(S_1)_V$  and  $E(T_1)_V$  than the functional B3LYP. The function M06-2X also overestimates  $E(S_1)_V$  and shows similar results to CAM-B3LYP and  $\omega$ B97XD, while the overestimation of  $E(T_1)_V$  is more severe than the two functions. The  $S_1$  energies of **A0** and **A1** calculated by TDA-B3LYP are within 0.1 eV of the experimental reference. To the best of our knowledge, no experimental gas-phase or solvent reference for the  $T_1$  state of tetracene has been reported so far. If one assumes that, the gas-phase triplet energy is about 0.189 eV above the energy in the crystal, then the agreement is also good in this case.

To show how Tamm-Dancoff (TDA) approximation improves the triplet instability problem<sup>3,4</sup>, we compare the excitation energy calculated by TD-DFT and TDA methods. The results suggest that TDA apparently remedies the triplet instability problem. It also improves the problem of underestimating the energy of  $S_1$  state for tetracene compared to TD-DFT<sup>5</sup> (Table S3).

The solvation effects have similar patterns for these three model compounds. Moreover, the basis set was extended to larger basis sets, including 6-311G\*, 6-311G\*\* and cc-pVTZ. The calculated results show that solvation effects affect the SF-relevant excited state energies (Table S4), while the excitation energies are insensitive to the extension of basis set (Table S5). All test results show that our calculation method is reliable.

Singlet fission is an intrinsically multi-molecular process, and electronic coupling among adjacent molecules may affect the SF relevant excited energies. We calculated  $E(S_1)_V$ ,  $E(T_1)_V$  and Davydov splitting energy  $\Delta E_{DV}$  for these dimers at the theoretical

level of TDA- $\omega$ B97XD/6-31G\* based on the geometrical without optimizations. The Davydov splitting energy is a useful indicator of the electronic coupling strength between adjacent molecules, as demonstrated in previous studies.<sup>6,7</sup> Three dimeric structures were selected from its crystal (Fig. S2) and the SF relevant excited state energies and Davydov splitting energies were calculated (Table S7).

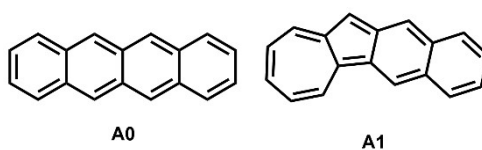

**Fig. S1** Molecular structures of the involved molecules for test.

**Table S1** Vertical excitation energies (eV) of model compounds with different functionals based on  $S_0$  geometries.<sup>a</sup>

| Compound |                | $E(S_1)_v$         | $E(T_1)_v$         |
|----------|----------------|--------------------|--------------------|
| A0       | B3LYP          | 2.740              | 1.438              |
|          | CAM-B3LYP      | 3.163              | 1.537              |
|          | M06-2X         | 3.168              | 1.767              |
|          | $\omega$ B97XD | 3.225              | 1.597              |
|          | Tuned-LC-BLYP  | 3.147              |                    |
|          | Exp.           | 2.710 <sup>b</sup> | 1.250 <sup>c</sup> |
| A1       | B3LYP          | 2.030              | 1.437              |
|          | CAM-B3LYP      | 2.390              | 1.583              |
|          | M06-2X         | 2.377              | 1.730              |
|          | $\omega$ B97XD | 2.412              | 1.627              |
|          | Tuned-LC-BLYP  | 2.255              |                    |
|          | Exp.           | 1.916 <sup>d</sup> |                    |

<sup>a</sup>Calculated  $E(S_1)_v$  and  $E(T_1)_v$  based on the optimized  $S_0$  geometries at the theoretical level of B3LYP/6-31G\*.

<sup>b</sup>Reference <sup>8</sup>. <sup>c</sup>Reference <sup>9</sup>: 0–0 transition (crystal). <sup>d</sup>Reference <sup>10</sup>: in MeOH

**Table S2** Tuned range separating parameters  $\mu$ (bohr<sup>-1</sup>) in LC-BLYP/6-31G\* with Quantum program optDFTw.

|       | A0     | A1     |
|-------|--------|--------|
| $\mu$ | 0.2245 | 0.2146 |

**Table S3** Comparison of the excitation energies using the TDDFT with and without Tamm-Dancoff approximation (TDA).

| Molecule | TD          | TDA         |
|----------|-------------|-------------|
| A0       | 2.514/1.153 | 2.740/1.438 |
| A1       | 1.938/1.238 | 2.030/1.437 |

**Table S4** Solvation effects on vertical excitation energies (eV) of S<sub>1</sub> and T<sub>1</sub> states

| <b>Molecule</b> | <b>Vacuum</b> | <b>Toluene</b> | <b>DCM</b>  | <b>MeOH</b> |
|-----------------|---------------|----------------|-------------|-------------|
| <b>A0</b>       | 2.740/1.438   | 2.697/1.463    | 2.634/1.464 | 2.611/1.464 |
| <b>A1</b>       | 2.030/1.437   | 2.030/1.452    | 2.056/1.466 | 2.065/1.471 |

**Table S5** Basis set effects on the vertical excitation energies (eV) of the S<sub>1</sub> and T<sub>1</sub> states of the three model compounds.

| <b>Molecule</b> | <b>6-31G*</b> | <b>6-311G*</b> | <b>6-311G**</b> | <b>cc-pVTZ</b> |
|-----------------|---------------|----------------|-----------------|----------------|
| <b>A0</b>       | 2.740/1.438   | 2.707/1.457    | 2.707/1.458     | 2.666/1.449    |
| <b>A1</b>       | 2.030/1.438   | 1.997/1.424    | 1.993/1.423     | 1.971/1.412    |

**Table S6** Comparison of the adiabatic energies  $E(T_1)$  (eV) using the TDDFT with Tamm-Dancoff approximation (TDA) and UDFT.

| <b>Compound</b> | <b>UDFT</b> | <b>TDA</b> |
|-----------------|-------------|------------|
| <b>A1</b>       | 1.052       | 1.091      |
| <b>A2</b>       | 1.196       | 1.229      |
| <b>A3</b>       | 0.717       | 0.794      |
| <b>A4</b>       | 0.500       | 0.560      |
| <b>A5</b>       | 0.610       | 0.663      |
| <b>B1</b>       | 1.425       | 1.463      |
| <b>B2</b>       | 1.351       | 1.393      |
| <b>B3</b>       | 0.588       | 0.661      |
| <b>B4</b>       | 0.708       | 0.769      |
| <b>B5</b>       | 0.606       | 0.674      |
| <b>B6</b>       | 0.402       | 0.432      |

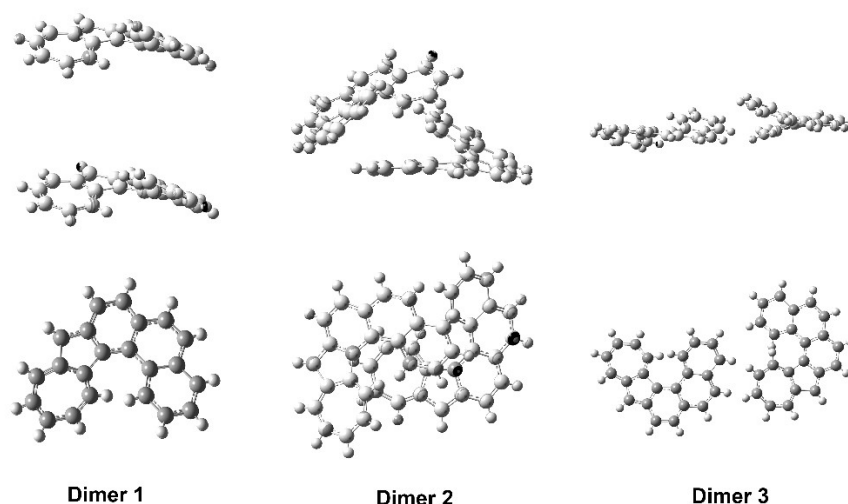

**Fig. S2** Geometry structures of [5]AzH dimers.

**Table S7** Effect of electronic coupling in [5]AzH dimers on  $E(S_1)_V$  and  $E(T_1)_V$  in vacuum (oscillator strengths are listed in parentheses) (in eV).

| Compound | Monomer 1        | Monomer 2        | Dimer 1          | $\Delta E_{DV}(1)$ | Dimer 2          | $\Delta E_{DV}(2)$ | Dimer 3          | $\Delta E_{DV}(3)$ |
|----------|------------------|------------------|------------------|--------------------|------------------|--------------------|------------------|--------------------|
| $S_1$    | 1.741<br>(0.009) | 2.068<br>(0.008) | 1.732<br>(0.005) | 0.005              | 1.743<br>(0.010) | -                  | 1.742<br>(0.010) | -                  |
| $S_2$    | 3.006<br>(0.009) | 3.194<br>(0.111) | 1.737<br>(0.011) |                    | 2.093<br>(0.005) |                    | 2.073<br>(0.008) |                    |
| $S_3$    | 3.710<br>(0.166) | 3.832<br>(0.110) | 2.998<br>(0.005) |                    | 2.950<br>(0.032) |                    | 3.008<br>(0.015) |                    |
| $S_4$    | 3.983<br>(0.939) | 4.169<br>(0.925) | 3.002<br>(0.012) |                    | 3.008<br>(0.032) |                    | 3.193<br>(0.132) |                    |
| $T_1$    | 1.268            | 1.630            | 1.260            | 0.004              | 1.279            | -                  | 1.270            | -                  |
| $T_2$    | 1.917            | 1.896            | 1.264            |                    | 1.662            |                    | 1.634            |                    |
| $T_3$    | 2.438            | 2.840            | 1.908            |                    | 1.917            |                    | 1.901            |                    |
| $T_4$    | 2.774            | 2.924            | 1.914            |                    | 1.927            |                    | 1.925            |                    |

In Dimer 2 and Dimer 3, there are two distinct monomers (monomer 1 and 2), and the  $S_1$  ( $T_1$ ) and  $S_2$  ( $T_2$ ) energies are originated from monomer 1 and 2, respectively. As a result, their excited states maintain the characteristics of the individual monomers and no electronic coupling is presented in dimer 2 and 3.



**Table S8** Hammett constant ( $\sigma_p$ ) of the introduced substituents.<sup>11</sup>

|            | <b>-F</b>  | <b>-Cl</b> | <b>-Br</b>  | <b>-CF<sub>3</sub></b> | <b>-CN</b>              |
|------------|------------|------------|-------------|------------------------|-------------------------|
| $\sigma_p$ | 0.06       | 0.23       | 0.23        | 0.54                   | 0.66                    |
|            | <b>-Me</b> | <b>-OH</b> | <b>-OMe</b> | <b>-NH<sub>2</sub></b> | <b>-NMe<sub>2</sub></b> |
| $\sigma_p$ | -0.17      | -0.37      | -0.27       | -0.66                  | -0.83                   |

**Table S9** Difference electronic energy (eV) between open-shell symmetry-broken singlet and closed-shell RB3LYP solution ( $\Delta E_{OS-CS}$ ), triplet-singlet gap ( $\Delta E_{T-OS}$ ) at the B3LYP level, spin contamination for the open shell singlet ( $\langle S^2 \rangle$ ).

| <b>Compound</b> | <b>y<sub>0</sub></b> | <b>Stability</b>    | <b><math>\Delta E_{OS-CS}</math></b> | <b><math>\Delta E_{T-OS}</math></b> | <b><math>\langle S^2 \rangle</math></b> |
|-----------------|----------------------|---------------------|--------------------------------------|-------------------------------------|-----------------------------------------|
| <b>A1</b>       | 0.223                | Stable              | 0.000                                | 1.052                               | 0                                       |
| <b>A2</b>       | 0.207                | Stable              | 0.000                                | 1.196                               | 0                                       |
| <b>A3</b>       | 0.322                | Stable              | 0.000                                | 0.717                               | 0                                       |
| <b>A4</b>       | 0.372                | Stable              | 0.000                                | 0.500                               | 0                                       |
| <b>A5</b>       | 0.320                | Stable              | 0.000                                | 0.610                               | 0                                       |
| <b>A6</b>       | 0.791                | RHF→UHF instability | -0.127                               | 0.003                               | 1.069                                   |
| <b>B1</b>       | 0.147                | Stable              | 0.000                                | 1.425                               | 0                                       |
| <b>B2</b>       | 0.141                | Stable              | 0.000                                | 1.351                               | 0                                       |
| <b>B3</b>       | 0.319                | Stable              | 0.000                                | 0.588                               | 0                                       |
| <b>B4</b>       | 0.257                | Stable              | 0.000                                | 0.708                               | 0                                       |
| <b>B5</b>       | 0.337                | Stable              | 0.000                                | 0.606                               | 0                                       |
| <b>B6</b>       | 0.621                | Stable              | 0.000                                | 0.402                               | 0                                       |

**Table S10** HOMO, LUMO energies and HLG values (in eV), DRC  $y_0$  and TRC  $y_1$ .

|                         |          | <b>HOMO</b> | <b>LUMO</b> | <b>HLG</b> | <b><math>y_0</math></b> | <b><math>y_1</math></b> |
|-------------------------|----------|-------------|-------------|------------|-------------------------|-------------------------|
| <b>A0</b>               |          | -4.855      | -2.079      | 2.776      | 0.283                   | 0.033                   |
| <b>A1</b>               |          | -4.755      | -2.135      | 2.620      | 0.223                   | 0.058                   |
| <b>A2</b>               |          | -4.957      | -2.137      | 2.820      | 0.207                   | 0.288                   |
| <b>A3</b>               |          | -4.598      | -2.379      | 2.219      | 0.322                   | 0.063                   |
| <b>A4</b>               |          | -4.502      | -2.495      | 2.007      | 0.372                   | 0.027                   |
| <b>A5</b>               |          | -4.586      | -2.462      | 2.123      | 0.320                   | 0.017                   |
| <b>A6</b>               |          | -4.579      | -2.867      | 1.712      | 0.791                   | 0.036                   |
| <b>B0</b>               |          | -5.541      | -1.310      | 4.231      | 0.084                   | 0.052                   |
| <b>B1</b>               |          | -4.994      | -2.077      | 2.917      | 0.147                   | 0.107                   |
| <b>B2</b>               |          | -4.998      | -2.117      | 2.881      | 0.141                   | 0.116                   |
| <b>B3</b>               |          | -4.615      | -2.520      | 2.095      | 0.319                   | 0.076                   |
| <b>B4</b>               |          | -4.655      | -2.395      | 2.260      | 0.257                   | 0.077                   |
| <b>B5</b>               |          | -4.754      | -2.446      | 2.308      | 0.337                   | 0.034                   |
| <b>B6</b>               |          | -4.383      | -2.730      | 1.653      | 0.621                   | 0.050                   |
|                         |          |             | <b>B4a</b>  |            |                         |                         |
| <b>-F</b>               | $\alpha$ | -4.839      | -2.471      | 2.368      | 0.243                   | 0.074                   |
|                         | $\beta$  | -4.734      | -2.483      | 2.250      | 0.254                   | 0.064                   |
| <b>-Cl</b>              | $\alpha$ | -4.937      | -2.655      | 2.282      | 0.259                   | 0.073                   |
|                         | $\beta$  | -4.868      | -2.623      | 2.245      | 0.245                   | 0.066                   |
| <b>-Br</b>              | $\alpha$ | -4.932      | -2.659      | 2.272      | 0.259                   | 0.073                   |
|                         | $\beta$  | -4.860      | -2.625      | 2.235      | 0.242                   | 0.067                   |
| <b>-CF<sub>3</sub></b>  | $\alpha$ | -5.094      | -2.828      | 2.266      | 0.258                   | 0.070                   |
|                         | $\beta$  | -5.189      | -2.810      | 2.379      | 0.218                   | 0.070                   |
| <b>-CN</b>              | $\alpha$ | -5.237      | -3.156      | 2.081      | 0.302                   | 0.069                   |
|                         | $\beta$  | -5.262      | -3.007      | 2.255      | 0.241                   | 0.066                   |
| <b>-Me</b>              | $\alpha$ | -4.696      | -2.323      | 2.373      | 0.236                   | 0.068                   |
|                         | $\beta$  | -4.635      | -2.364      | 2.271      | 0.253                   | 0.068                   |
| <b>-OH</b>              | $\alpha$ | -4.607      | -2.183      | 2.424      | 0.225                   | 0.068                   |
|                         | $\beta$  | -4.379      | -2.268      | 2.111      | 0.279                   | 0.059                   |
| <b>-OMe</b>             | $\alpha$ | -4.566      | -2.101      | 2.465      | 0.215                   | 0.064                   |
|                         | $\beta$  | -4.585      | -2.364      | 2.221      | 0.259                   | 0.064                   |
| <b>-NH<sub>2</sub></b>  | $\alpha$ | -4.345      | -1.954      | 2.391      | 0.221                   | 0.064                   |
|                         | $\beta$  | -4.156      | -2.137      | 2.019      | 0.292                   | 0.055                   |
| <b>-NMe<sub>2</sub></b> | $\alpha$ | -4.224      | -1.864      | 2.360      | 0.215                   | 0.062                   |
|                         | $\beta$  | -4.681      | -2.388      | 2.293      | 0.250                   | 0.068                   |
|                         |          |             | <b>B4b</b>  |            |                         |                         |
| <b>-F</b>               |          | -5.242      | -2.782      | 2.461      | 0.212                   | 0.094                   |
| <b>-Cl</b>              |          | -5.327      | -2.960      | 2.367      | 0.225                   | 0.095                   |
| <b>-Br</b>              |          | -5.319      | -2.961      | 2.357      | 0.226                   | 0.095                   |
| <b>-CF<sub>3</sub></b>  |          | -5.478      | -3.132      | 2.346      | 0.220                   | 0.092                   |

**Table S10** HOMO, LUMO energies and HLG values (in eV), DRC  $y_0$  and TRC  $y_1$ . (continued table).

|                         | <b>HOMO</b> | <b>LUMO</b> | <b>HLG</b> | <b><math>y_0</math></b> | <b><math>y_1</math></b> |
|-------------------------|-------------|-------------|------------|-------------------------|-------------------------|
| <b>-CN</b>              | -5.611      | -3.462      | 2.149      | 0.261                   | 0.093                   |
| <b>-Me</b>              | -5.097      | -2.624      | 2.473      | 0.202                   | 0.088                   |
| <b>-OMe</b>             | -4.964      | -2.393      | 2.571      | 0.184                   | 0.084                   |
| <b>-OH</b>              | -5.012      | -2.485      | 2.527      | 0.195                   | 0.088                   |
| <b>-NH<sub>2</sub></b>  | -5.097      | -2.624      | 2.473      | 0.191                   | 0.081                   |
| <b>-NMe<sub>2</sub></b> | -4.629      | -2.138      | 2.490      | 0.184                   | 0.078                   |

**Table S11** Vertical excitation energies ( $E(S_1)_V$  and  $E(T_1)_V$ ), oscillator strength (f), adiabatic excitation energies ( $E(S_1)$ ,  $E(T_1)$  and  $E(T_2)$ ) and the  $\Delta E_{SF}$  and  $\Delta E_{TTA}$  (in eV).<sup>g</sup>

|                         |          | $E(S_1)_V$ | f     | $E(S_1)$ | $E(T_1)_V$ | $E(T_1)$ | $E(T_2)$ | $\Delta E_{SF}$ | $\Delta E_{TTA}$ |
|-------------------------|----------|------------|-------|----------|------------|----------|----------|-----------------|------------------|
| <b>A0</b>               |          | 2.740      | 0.089 | 2.617    | 1.438      | 1.201    | 2.546    | 0.214           | 0.144            |
| <b>A1</b>               |          | 2.027      | 0.018 | 1.640    | 1.434      | 1.052    | 1.842    | -0.464          | -0.262           |
| <b>A2</b>               |          | 2.352      | 0.031 | 1.965    | 1.596      | 1.196    | 2.091    | -0.426          | -0.300           |
| <b>A3</b>               |          | 1.755      | 0.021 | 1.457    | 1.023      | 0.717    | 1.957    | 0.024           | 0.524            |
| <b>A4</b>               |          | 1.481      | 0.035 | 0.939    | 0.900      | 0.500    | 1.459    | -0.061          | 0.459            |
| <b>A5</b>               |          | 1.614      | 0.038 | 1.105    | 0.999      | 0.610    | 1.646    | -0.115          | 0.426            |
| <b>B0</b>               |          | 3.674      | 0.001 | 3.544    | 2.760      | 2.574    | 3.087    | -1.604          | -2.061           |
| <b>B1</b>               |          | 2.184      | 0.012 | 1.846    | 1.747      | 1.425    | 2.053    | -1.005          | -0.798           |
| <b>B2</b>               |          | 2.158      | 0.024 | 1.754    | 1.719      | 1.351    | 2.055    | -0.948          | -0.647           |
| <b>B3</b>               |          | 1.536      | 0.015 | 1.171    | 0.934      | 0.588    | 1.823    | -0.005          | 0.647            |
| <b>B4</b>               |          | 1.936      | 0.041 | 1.569    | 1.074      | 0.708    | 1.501    | 0.153           | 0.085            |
| <b>B5</b>               |          | 2.002      | 0.037 | 1.499    | 1.050      | 0.606    | 1.525    | 0.287           | 0.314            |
| <b>B6</b>               |          | 1.088      | 0.010 | 0.691    | 0.699      | 0.402    | 1.024    | -0.112          | 0.221            |
| <b>B4a</b>              |          |            |       |          |            |          |          |                 |                  |
| <b>-F</b>               | $\alpha$ | 1.962      | 0.028 | 1.587    | 1.204      | 0.846    | 1.462    | -0.105          | -0.231           |
|                         | $\beta$  | 1.896      | 0.037 | 1.533    | 1.066      | 0.716    | 1.474    | 0.101           | 0.042            |
| <b>-Cl</b>              | $\alpha$ | 1.954      | 0.051 | 1.607    | 1.114      | 0.769    | 1.513    | 0.069           | -0.025           |
|                         | $\beta$  | 1.925      | 0.047 | 1.567    | 1.095      | 0.771    | 1.529    | 0.025           | -0.013           |
| <b>-Br</b>              | $\alpha$ | 1.950      | 0.058 | 1.608    | 1.109      | 0.766    | 1.513    | 0.075           | -0.014           |
|                         | $\beta$  | 1.917      | 0.050 | 1.563    | 1.095      | 0.780    | 1.531    | 0.003           | -0.028           |
| <b>-CF<sub>3</sub></b>  | $\alpha$ | 2.015      | 0.065 | 1.690    | 1.073      | 0.711    | 1.628    | 0.269           | 0.207            |
|                         | $\beta$  | 2.083      | 0.050 | 1.733    | 1.236      | 0.944    | 1.688    | -0.154          | -0.199           |
| <b>-CN</b>              | $\alpha$ | 1.928      | 0.111 | 1.646    | 0.928      | 0.616    | 1.485    | 0.415           | 0.454            |
|                         | $\beta$  | 1.992      | 0.055 | 1.651    | 1.163      | 0.921    | 1.636    | -0.191          | -0.207           |
| <b>-Me</b>              | $\alpha$ | 2.045      | 0.045 | 1.683    | 1.200      | 0.837    | 1.562    | 0.010           | -0.111           |
|                         | $\beta$  | 1.933      | 0.044 | 1.578    | 1.090      | 0.735    | 1.520    | 0.108           | 0.049            |
| <b>-OMe</b>             | $\alpha$ | 2.064      | 0.032 | 1.675    | 1.314      | 1.003    | 1.474    | -0.331          | -0.532           |
|                         | $\beta$  | 1.871      | 0.041 | 1.369    | 1.046      | 0.573    | 1.296    | 0.223           | 0.150            |
| <b>-OH</b>              | $\alpha$ | 1.996      | 0.027 | 1.603    | 1.286      | 0.951    | 1.438    | -0.298          | -0.464           |
|                         | $\beta$  | 1.739      | 0.032 | 1.392    | 0.933      | 0.590    | 1.327    | 0.212           | 0.147            |
| <b>-NH<sub>2</sub></b>  | $\alpha$ | 1.949      | 0.028 | 1.565    | 1.303      | 0.965    | 1.525    | -0.365          | -0.406           |
|                         | $\beta$  | 1.635      | 0.032 | 1.269    | 0.846      | 0.484    | 1.226    | 0.300           | 0.257            |
| <b>-NMe<sub>2</sub></b> | $\alpha$ | 1.936      | 0.041 | 1.582    | 1.304      | 1.000    | 1.436    | -0.417          | -0.563           |
|                         | $\beta$  | 1.962      | 0.047 | 1.476    | 1.118      | 0.473    | 1.197    | 0.530           | 0.251            |
| <b>B4b</b>              |          |            |       |          |            |          |          |                 |                  |
| <b>-F</b>               |          | 2.089      | 0.031 | 1.736    | 1.360      | 1.028    | 1.671    | -0.320          | -0.385           |
| <b>-Cl</b>              |          | 2.055      | 0.058 | 1.739    | 1.267      | 0.943    | 1.577    | -0.146          | -0.308           |
| <b>-Br</b>              |          | 2.050      | 0.066 | 1.738    | 1.262      | 0.939    | 1.571    | -0.140          | -0.308           |
| <b>-CF<sub>3</sub></b>  |          | 2.160      | 0.052 | 1.684    | 1.363      | 0.876    | 1.474    | -0.067          | -0.277           |
| <b>-CN</b>              |          | 2.143      | 0.031 | 1.587    | 1.446      | 0.768    | 1.359    | 0.051           | -0.177           |

**Table S11** Vertical excitation energies ( $E(S_1)_V$  and  $E(T_1)_V$ ), oscillator strength (f), adiabatic excitation energies ( $E(S_1)$ ,  $E(T_1)$  and  $E(T_2)$ ) and the  $\Delta E_{SF}$  and  $\Delta E_{TTA}$  (in eV) (continued table).<sup>c</sup>

|                         | $E(S_1)_V$ | f     | $E(S_1)$ | $E(T_1)_V$ | $E(T_1)$ | $E(T_2)$ | $\Delta E_{SF}$ | $\Delta E_{TTA}$ |
|-------------------------|------------|-------|----------|------------|----------|----------|-----------------|------------------|
| <b>-OMe</b>             | 2.075      | 0.010 | 1.830    | 1.228      | 1.192    | 1.660    | -0.554          | -0.724           |
| <b>-OH</b>              | 2.209      | 0.038 | 1.760    | 1.482      | 1.139    | 1.623    | -0.519          | -0.656           |
| <b>-NH<sub>2</sub></b>  | 2.119      | 0.032 | 1.735    | 1.466      | 1.166    | 1.735    | -0.598          | -0.598           |
| <b>-NMe<sub>2</sub></b> | 2.119      | 0.050 | 1.758    | 1.468      | 1.157    | 1.810    | -0.556          | -0.504           |

<sup>c</sup>Due to the open-shell singlet ground state of **A6**, its excitation energy was not considered.

**Table S12** N<sup>FOD</sup> for all compounds considered in this work at the TPSS/def2-TZVP Level.

| <b>Compound</b>         |            | <b>N<sup>FOD</sup></b> |
|-------------------------|------------|------------------------|
| <b>A0</b>               |            | 0.518                  |
| <b>B0</b>               |            | 0.190                  |
| <b>C0</b>               |            | 0.146                  |
| <b>A1</b>               |            | 0.627                  |
| <b>A2</b>               |            | 0.537                  |
| <b>A3</b>               |            | 0.773                  |
| <b>A4</b>               |            | 0.893                  |
| <b>A5</b>               |            | 0.822                  |
| <b>A6</b>               |            | 1.669                  |
| <b>B1</b>               |            | 0.513                  |
| <b>B2</b>               |            | 0.530                  |
| <b>B3</b>               |            | 0.846                  |
| <b>B4</b>               |            | 0.798                  |
| <b>B5</b>               |            | 0.776                  |
| <b>B6</b>               |            | 1.157                  |
| <b>B4a</b>              |            | 0.774                  |
| <b>B4b</b>              |            | 0.731                  |
|                         | <b>B4a</b> |                        |
| <b>-F</b>               | $\alpha$   | 0.771                  |
|                         | $\beta$    | 0.822                  |
| <b>-Cl</b>              | $\alpha$   | 0.804                  |
|                         | $\beta$    | 0.819                  |
| <b>-Br</b>              | $\alpha$   | 0.813                  |
|                         | $\beta$    | 0.819                  |
| <b>-CF<sub>3</sub></b>  | $\alpha$   | 0.808                  |
|                         | $\beta$    | 0.737                  |
| <b>-CN</b>              | $\alpha$   | 0.894                  |
|                         | $\beta$    | 0.782                  |
| <b>-Me</b>              | $\alpha$   | 0.755                  |
|                         | $\beta$    | 0.809                  |
| <b>-OMe</b>             | $\alpha$   | 0.731                  |
|                         | $\beta$    | 0.845                  |
| <b>-OH</b>              | $\alpha$   | 0.753                  |
|                         | $\beta$    | 0.918                  |
| <b>-NH<sub>2</sub></b>  | $\alpha$   | 0.768                  |
|                         | $\beta$    | 0.982                  |
| <b>-NMe<sub>2</sub></b> | $\alpha$   | 0.774                  |
|                         | $\beta$    | 0.851                  |
|                         | <b>B4b</b> |                        |
| <b>-F</b>               |            | 0.724                  |
| <b>-Cl</b>              |            | 0.761                  |

**Table S12**  $N^{\text{FOD}}$  for all compounds considered in this work at the TPSS/def2-TZVP Level  
(continued table).

| <b>Compound</b>         | <b><math>N^{\text{FOD}}</math></b> |
|-------------------------|------------------------------------|
| <b>-Br</b>              | 0.771                              |
| <b>-CF<sub>3</sub></b>  | 0.773                              |
| <b>-CN</b>              | 0.861                              |
| <b>-Me</b>              | 0.708                              |
| <b>-OMe</b>             | 0.678                              |
| <b>-OH</b>              | 0.700                              |
| <b>-NH<sub>2</sub></b>  | 0.704                              |
| <b>-NMe<sub>2</sub></b> | 0.706                              |

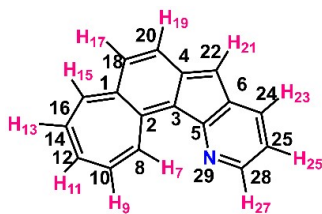

**Fig. S3** Molecular structure of **B4a**.

**Table S13** Mulliken spin population<sup>12</sup> of **B4a** calculated at PUHF/6-31G<sup>\*</sup> level.

| Atom site | Atom type | Spin population |
|-----------|-----------|-----------------|
| 1         | C         | 0.744           |
| 2         | C         | 0.523           |
| 3         | C         | -0.556          |
| 4         | C         | -0.698          |
| 5         | C         | 0.744           |
| 6         | C         | -0.806          |
| 7         | H         | 0.055           |
| 8         | C         | -0.839          |
| 9         | H         | -0.055          |
| 10        | C         | 0.837           |
| 11        | H         | 0.060           |
| 12        | C         | -0.892          |
| 13        | H         | -0.058          |
| 14        | C         | 0.870           |
| 15        | H         | 0.055           |
| 16        | C         | -0.853          |
| 17        | H         | 0.044           |
| 18        | C         | -0.749          |
| 19        | H         | -0.043          |
| 20        | C         | 0.745           |
| 21        | H         | -0.047          |
| 22        | C         | 0.839           |
| 23        | H         | -0.048          |
| 24        | C         | 0.790           |
| 25        | H         | 0.048           |
| 26        | C         | -0.766          |
| 27        | H         | -0.051          |
| 28        | C         | 0.746           |
| 29        | N         | -0.640          |



**Table S14** Comparison of the vertical excitation energy of S<sub>1</sub> with the energy at the CI point (eV).

| <b>Compound</b>                             | <b><math>E(S_1)_v</math></b> | <b><math>E(S_1)_{CI}</math></b> | <b><math>\Delta E(S_{1CI}-S_{1v})</math></b> |
|---------------------------------------------|------------------------------|---------------------------------|----------------------------------------------|
| <b>A1</b>                                   | 2.319                        | 2.305                           | -0.014                                       |
| <b>A2</b>                                   | 2.501                        | 2.746                           | 0.245                                        |
| <b>A3</b>                                   | 1.570                        | 1.911                           | 0.341                                        |
| <b>A4</b>                                   | 1.662                        | 1.049                           | -0.613                                       |
| <b>A5</b>                                   | 1.790                        | 1.232                           | -0.558                                       |
| <b>B1</b>                                   | 2.268                        | 2.681                           | 0.350                                        |
| <b>B2</b>                                   | 2.304                        | 1.707                           | -0.136                                       |
| <b>B3</b>                                   | 1.400                        | 1.260                           | -0.140                                       |
| <b>B4</b>                                   | 1.853                        | 2.075                           | 0.222                                        |
| <b>B5</b>                                   | 1.945                        | 1.787                           | -0.158                                       |
| <b>B6</b>                                   | 1.062                        | 0.661                           | -0.401                                       |
| <b>B4a</b>                                  | 1.891                        | 2.418                           | 0.527                                        |
| <b>B4b</b>                                  | 2.014                        | 2.517                           | 0.503                                        |
| <b><math>\beta</math>CF<sub>3</sub>-B4b</b> | 1.819                        | 2.380                           | 0.561                                        |

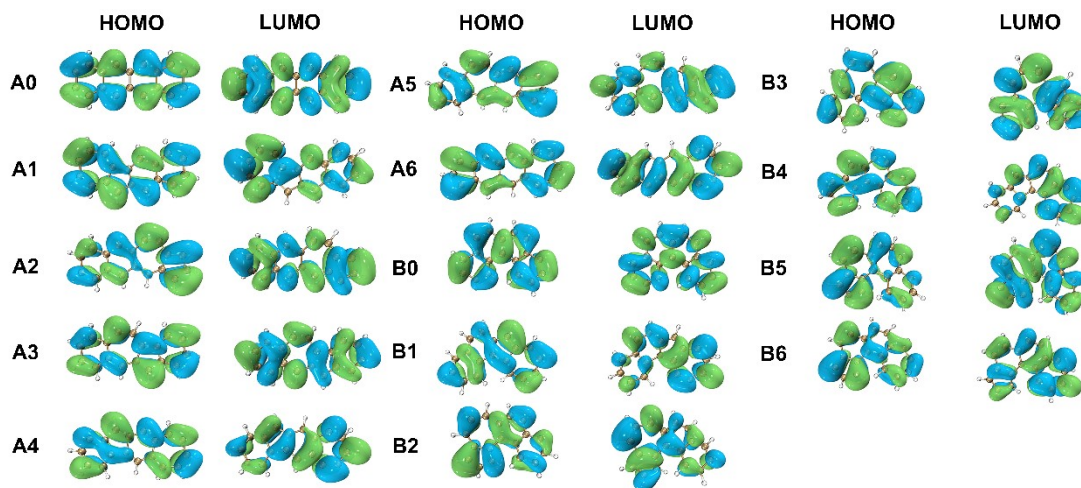

Fig. S4 Electron density distributions of HOMO and LUMO in azulene-containing analogues (A0-B6) (isovalue=0.02 e $\cdot$ bohr $^{-3}$ ).

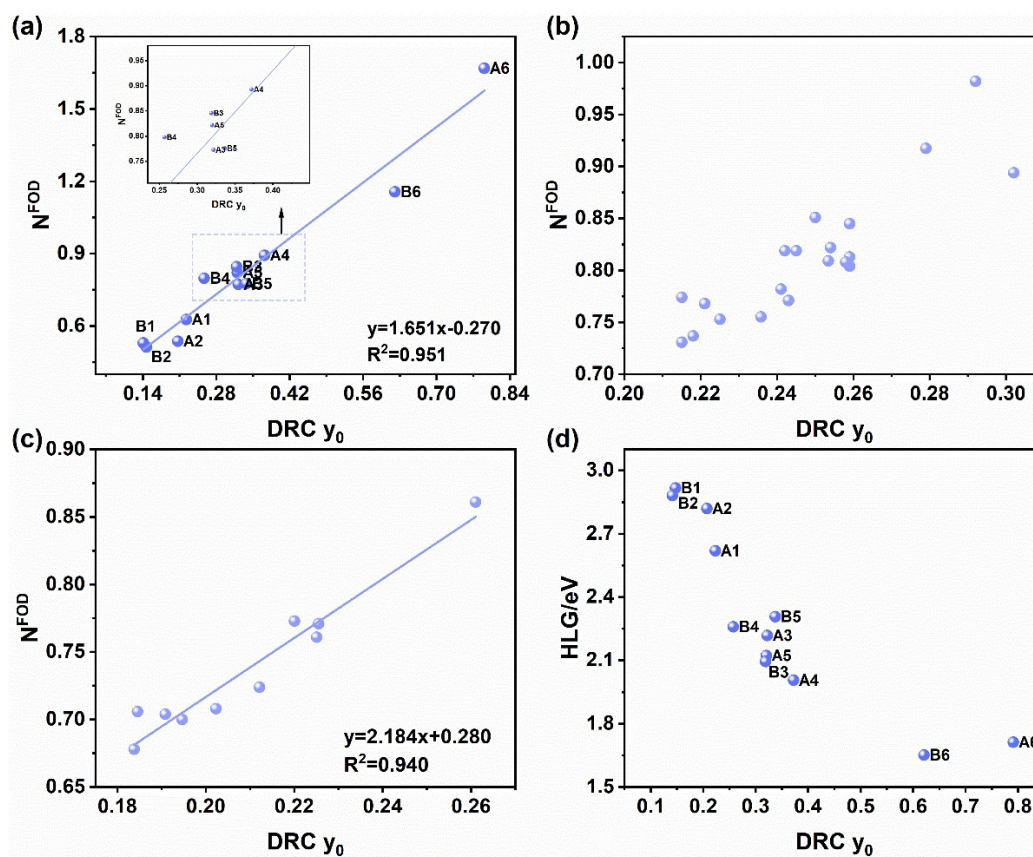

Fig. S5 Comparison of DRC  $y_0$  and the  $N^{FOD}$  values for (a) azulene-containing analogues (A1-B6) (b) B4a derivatives and (c) B4b derivatives (d) HLG versus DRC  $y_0$  for azulene-containing analogues (A1-B6).

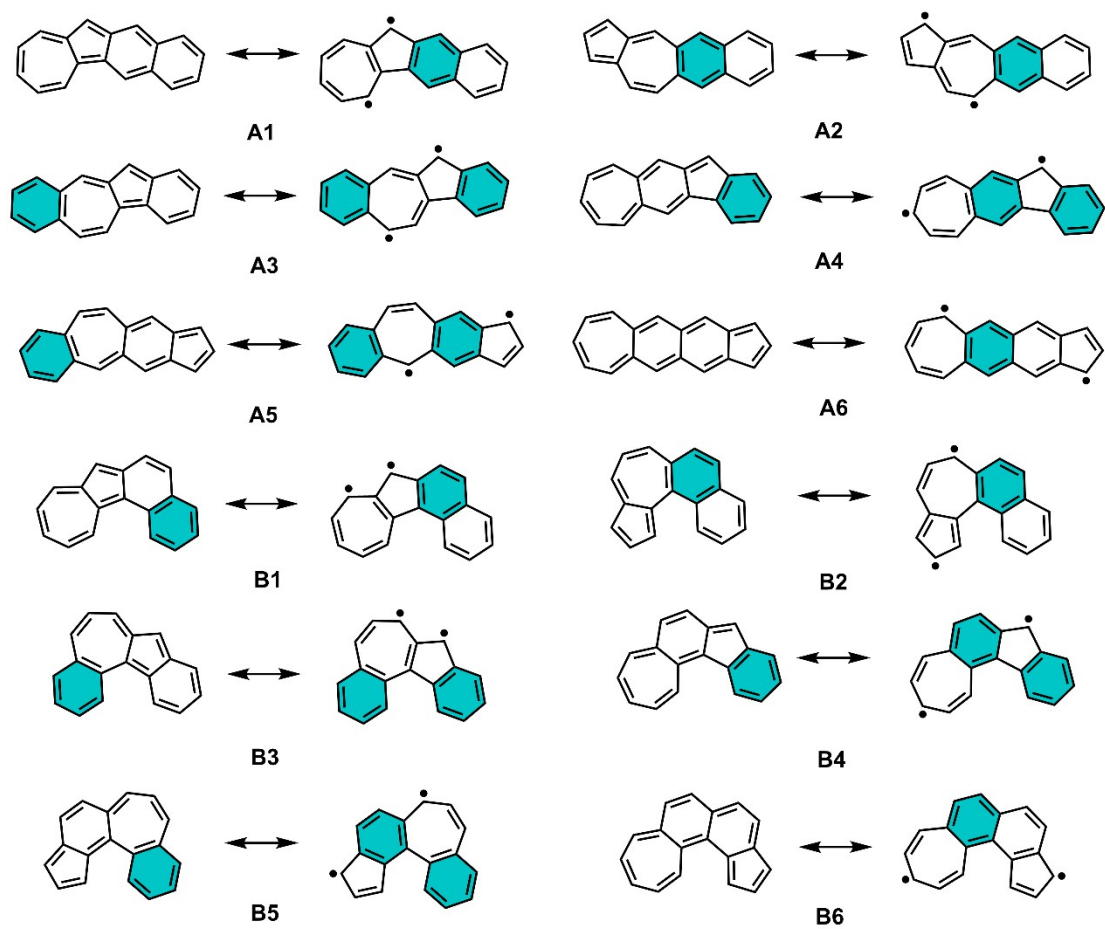

**Fig. S6** Closed-shell and open-shell resonance structures of azulene-containing analogues (A1-B6) based on OED isosurfaces (Clar's sextets are shown by color filing.).

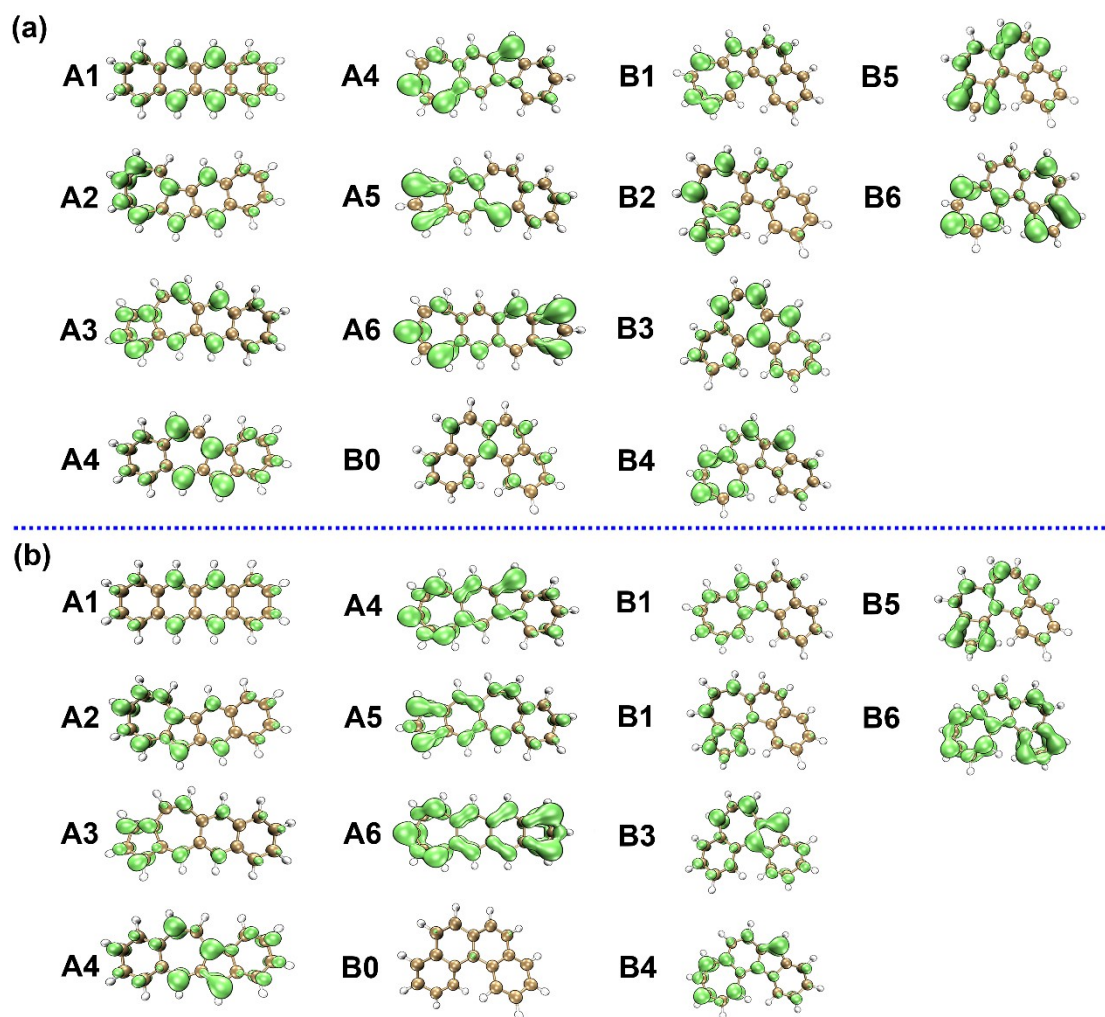

**Fig. S7** (a) OED corresponding to the broken symmetry solutions obtained at the UNO/6-31G\* level (isovalue=0.003  $e \cdot \text{bohr}^{-3}$ ). (b) Isocontour plot of the FOD density calculated at FT-TPSS/def2-TZVP level (isovalue=0.002  $e \cdot \text{bohr}^{-3}$ ).

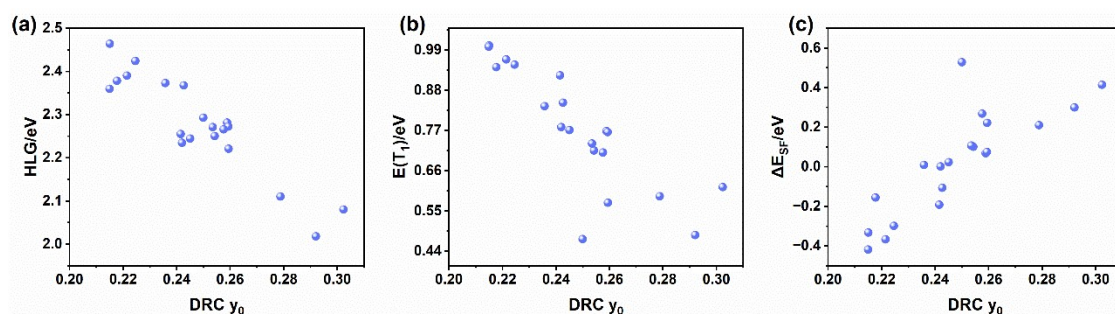

**Fig. S8** (a) HLG (b)  $E(T_1)$  and (c)  $\Delta E_{SF}$  for  $\alpha$  and  $\beta$  substituted **B4a** with respect to the DRC  $y_0$ .

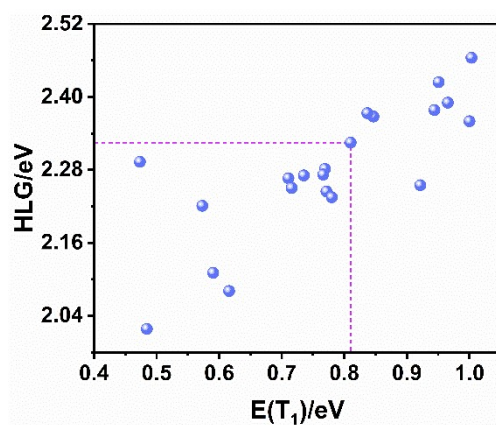

**Fig. S9** HLG for  $\alpha$  and  $\beta$  substituted **B4a** with respect to the  $E(T_1)$  (the dashed line indicates the HLG and corresponding  $E(T_1)$  of **B4a**).



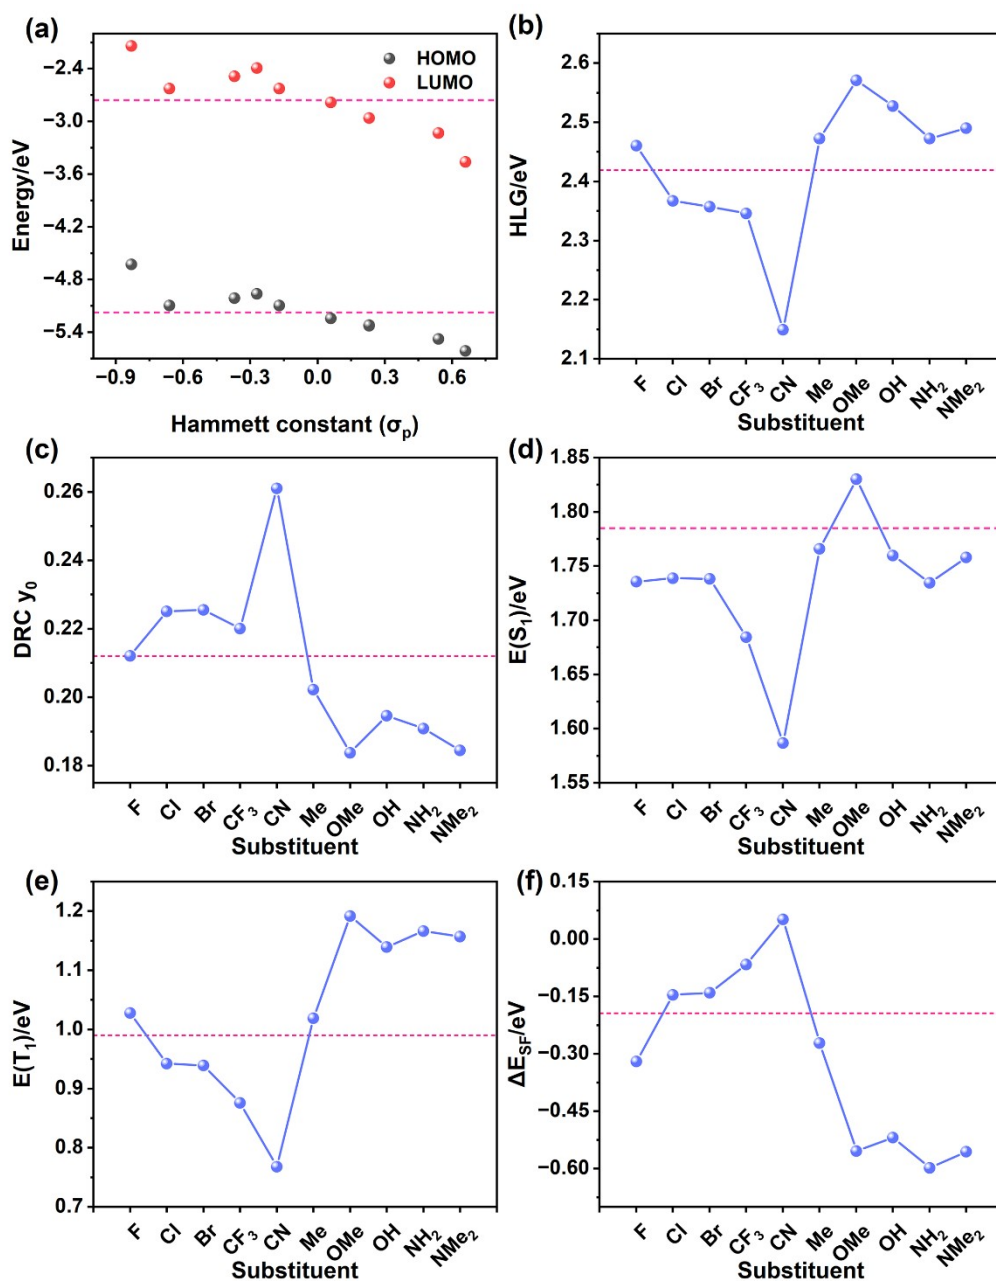

**Fig. S10** (a)  $E(\text{HOMO})$  and  $E(\text{LUMO})$  of **B4b** derivatives with respect to Hammett constant ( $\sigma_p$ ) of the attached substituents. (b) HLG (eV), (c) DRC  $y_0$ , (d)  $E(S_1)$ , (e)  $E(T_1)$ , and (f)  $\Delta E_{\text{SF}}$  for **B4b** derivatives. (The solid lines are only guides for the eyes and the dashed lines indicate the corresponding values of **B4b**).

The variation trend of HOMO, LUMO and HLG of **R-B4b** is similar to that of  **$\alpha$ R-B4a** (Fig. S9). For the same substituents, the HOMO and LUMO energies of **R-B4b** are lower than those of **R-B4a**. The electron density distribution of HOMO (4.72%) is smaller than that of LUMO (15.80%) at C15. As a result,

similar to  **$\alpha$ -B4a**, EWGs give a narrower HLG, while EDGs give a wider HLG. The effect of substituents on DRC  $y_0$  is also similar to  **$\alpha$ R-B4a**.

The variations of  $E(T_1)$  and  $E(S_1)$  show similar trend as that of HLG. Compared to the parent **B4b**, the introduction of EWGs results in a decrease in  $E(T_1)$ , while the EDGs show opposite effect. Only  **$\alpha$ MeO-B4b** shows slightly larger  $E(S_1)$  than **B4b**. Consequently, relatively weaker EWGs, -Cl and -Br, achieve balance between less endothermicity and appropriate  $E(T_1)$  to be SF sensitizers. Noticeably, these **B4b** derivatives suffer from significantly negative  $\Delta E_{\text{TFA}}$ .

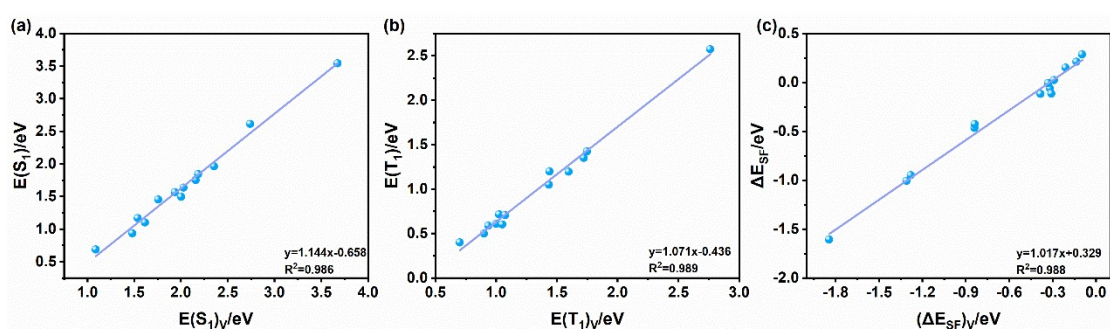

**Fig. S11** Correlation between the vertical and adiabatic energies of  $S_1$ ,  $T_1$ , and the corresponding  $\Delta E_{\text{SF}}$ .

As shown in Fig. S11, we observed a similar linear correlation between the vertical and adiabatic energies of  $S_1$ ,  $T_1$ , and  $\Delta E_{\text{SF}}$ , as reported by Corminboeuf et al.<sup>13</sup>. This correlation further supports the notion that the trends in adiabatic and vertical excitation energies are similar.

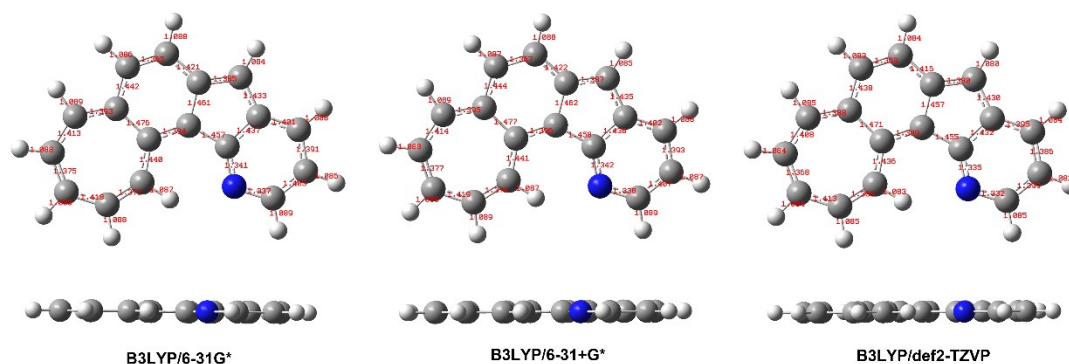

**Fig S12** Optimized geometries of **B4a** at different basis sets.

The geometry optimization of polycyclic aromatic hydrocarbons is not highly

sensitive to the choice of basis set.<sup>14</sup> Similarly, no significant differences were observed in the optimized geometries using the method of B3LYP/6-31G\*, B3LYP/6-31+G\*, or B3LYP/def2-TZVP in our study. With **B4a** as an example, we optimized its structure with these three different methods and showed them in Fig. S12. We found that the optimized molecular structure of **B4a** obtained from these three methods are almost the same. Therefore, the vertical/adiabatic energies, diradical character  $y_0$ , NICS and  $N^{\text{FOD}}$  calculated with the optimized  $S_0$  structures using different model chemistries should be reasonable.



### Coordinates of the geometries.

#### A0

|   |             |             |            |
|---|-------------|-------------|------------|
| C | -4.88938700 | 0.71536000  | 0.00000000 |
| C | -3.71162100 | 1.40935100  | 0.00000000 |
| C | -2.45063200 | 0.72605900  | 0.00000000 |
| C | -2.45063200 | -0.72605900 | 0.00000000 |
| C | -3.71162100 | -1.40935100 | 0.00000000 |
| C | -4.88938700 | -0.71536000 | 0.00000000 |
| C | -1.23566600 | 1.40634500  | 0.00000000 |
| C | -1.23566600 | -1.40634500 | 0.00000000 |
| C | 0.00020800  | -0.72649100 | 0.00000000 |
| C | 0.00020800  | 0.72649100  | 0.00000000 |
| C | 1.23526500  | 1.40621900  | 0.00000000 |
| H | 1.23583500  | 2.49455400  | 0.00000000 |
| C | 1.23526500  | -1.40621900 | 0.00000000 |
| H | -1.23572400 | 2.49466100  | 0.00000000 |
| H | -5.83678100 | 1.24775000  | 0.00000000 |
| H | -3.70975200 | 2.49693700  | 0.00000000 |
| H | -3.70975200 | -2.49693700 | 0.00000000 |
| H | -5.83678100 | -1.24775000 | 0.00000000 |
| H | -1.23572400 | -2.49466100 | 0.00000000 |
| H | 1.23583500  | -2.49455400 | 0.00000000 |
| C | 2.45091500  | 0.72603100  | 0.00000000 |
| C | 3.71131300  | 1.40905800  | 0.00000000 |
| C | 4.88956600  | 0.71503600  | 0.00000000 |
| C | 4.88956600  | -0.71503600 | 0.00000000 |
| C | 3.71131300  | -1.40905800 | 0.00000000 |
| C | 2.45091500  | -0.72603100 | 0.00000000 |
| H | 3.71012100  | 2.49669400  | 0.00000000 |
| H | 5.83652600  | 1.24832700  | 0.00000000 |
| H | 5.83652600  | -1.24832700 | 0.00000000 |
| H | 3.71012100  | -2.49669400 | 0.00000000 |

#### B0

|   |             |             |             |
|---|-------------|-------------|-------------|
| H | 4.62783700  | 0.42251500  | -0.40268400 |
| C | 3.74262900  | -0.17236400 | -0.18961900 |
| C | 1.46008100  | -1.63928200 | 0.43569100  |
| C | 2.70432100  | -2.24079400 | 0.45607000  |
| C | 3.85799700  | -1.51431700 | 0.10446400  |
| H | 0.60656800  | -2.21069600 | 0.77511000  |
| H | 2.79084100  | -3.27891600 | 0.76564200  |
| H | 4.83153400  | -1.99671600 | 0.10582300  |
| C | -3.85799800 | -1.51431700 | -0.10446600 |

|   |             |             |             |
|---|-------------|-------------|-------------|
| C | -3.74262900 | -0.17236400 | 0.18961600  |
| C | -2.48364800 | 0.47597400  | 0.18346100  |
| C | -1.28901200 | -0.28025700 | -0.05670100 |
| C | -1.46008100 | -1.63928200 | -0.43568800 |
| C | -2.70432100 | -2.24079400 | -0.45606900 |
| C | -2.40671400 | 1.89315400  | 0.34190200  |
| C | 0.00000000  | 0.39520300  | 0.00000100  |
| C | 0.00000000  | 1.81357800  | 0.00000100  |
| C | -1.21786100 | 2.53872500  | 0.18872100  |
| C | 1.21786200  | 2.53872500  | -0.18872000 |
| H | 1.16735100  | 3.62395500  | -0.23259600 |
| C | 2.40671400  | 1.89315400  | -0.34190200 |
| C | 2.48364800  | 0.47597400  | -0.18346200 |
| C | 1.28901200  | -0.28025600 | 0.05670300  |
| H | -3.32306000 | 2.44848000  | 0.52625100  |
| H | -4.83153500 | -1.99671600 | -0.10582800 |
| H | -4.62783600 | 0.42251700  | 0.40268000  |
| H | -0.60656800 | -2.21069800 | -0.77510400 |
| H | -2.79084200 | -3.27891600 | -0.76564100 |
| H | -1.16735000 | 3.62395500  | 0.23259800  |
| H | 3.32306000  | 2.44848100  | -0.52625200 |

**A1**

|   |             |             |             |
|---|-------------|-------------|-------------|
| C | -4.69287700 | 0.89943300  | 0.00000000  |
| C | -3.66494500 | 1.80542400  | 0.00000100  |
| C | -2.25664300 | 1.56076500  | 0.00000000  |
| C | -4.63613100 | -0.53066500 | -0.00000100 |
| C | -1.59043400 | 0.36768600  | 0.00000000  |
| C | -3.54043500 | -1.35096200 | 0.00000000  |
| C | -2.15255200 | -1.01033300 | 0.00000000  |
| H | -5.69737200 | 1.31871300  | 0.00000000  |
| H | -3.94867500 | 2.85573400  | 0.00000100  |
| H | -1.63668800 | 2.45628300  | 0.00000000  |
| H | -5.60315000 | -1.02912700 | 0.00000000  |
| H | -3.74252800 | -2.42171800 | -0.00000100 |
| C | -1.11165200 | -1.91361500 | 0.00000000  |
| H | -1.22176600 | -2.99230500 | 0.00000000  |
| C | -0.14258800 | 0.20523100  | 0.00000000  |
| C | 0.88251800  | 1.13116300  | 0.00000000  |
| C | 2.22860200  | 0.69660200  | 0.00000000  |
| C | 2.51740300  | -0.71870900 | 0.00000000  |
| C | 1.45592300  | -1.65304600 | 0.00000000  |
| C | 0.14315000  | -1.20994700 | 0.00000000  |
| H | 3.08767700  | 2.68304100  | 0.00000000  |

|   |            |             |             |
|---|------------|-------------|-------------|
| H | 0.67837800 | 2.20021000  | 0.00000000  |
| C | 3.31336300 | 1.61878500  | 0.00000000  |
| C | 3.88214500 | -1.12812400 | 0.00000100  |
| H | 1.68524800 | -2.71639900 | 0.00000000  |
| C | 4.90250200 | -0.20716300 | 0.00000000  |
| C | 4.61703900 | 1.18407000  | -0.00000100 |
| H | 4.10254300 | -2.19322800 | 0.00000000  |
| H | 5.93656200 | -0.54169200 | 0.00000000  |
| H | 5.43344500 | 1.90092000  | -0.00000100 |

**A2**

|   |             |             |             |
|---|-------------|-------------|-------------|
| C | -4.88989300 | 0.38370300  | 0.00000000  |
| C | -3.79200600 | 1.20941800  | 0.00000000  |
| C | -2.47457800 | 0.66625800  | 0.00000000  |
| C | -2.31629000 | -0.76017600 | 0.00000000  |
| C | -3.47660400 | -1.58692300 | 0.00000000  |
| C | -4.73200200 | -1.02995500 | 0.00000000  |
| H | -1.45140000 | 2.54967900  | 0.00000000  |
| H | -5.89012200 | 0.80806700  | 0.00000000  |
| H | -3.91200400 | 2.29006000  | 0.00000000  |
| C | -1.32134300 | 1.46975500  | 0.00000000  |
| C | -1.01207100 | -1.28025600 | -0.00000100 |
| H | -3.34911100 | -2.66685300 | 0.00000000  |
| H | -5.61259200 | -1.66608100 | 0.00000100  |
| C | 0.13893500  | -0.48314300 | 0.00000000  |
| C | -0.01808600 | 0.96136500  | -0.00000100 |
| H | -0.89066900 | -2.36129000 | 0.00000000  |
| C | 1.04584400  | 1.94203200  | 0.00000000  |
| C | 2.40334800  | 1.80786500  | 0.00000000  |
| C | 3.19118900  | 0.62391200  | 0.00000000  |
| C | 1.38980500  | -1.20307000 | 0.00000000  |
| C | 2.68161800  | -0.76862300 | 0.00000000  |
| H | 0.68063700  | 2.96720600  | 0.00000000  |
| H | 2.97254600  | 2.73695800  | 0.00000000  |
| H | 1.26638400  | -2.28623900 | -0.00000100 |
| C | 4.56886700  | 0.54545400  | 0.00000000  |
| H | 5.24772600  | 1.39088600  | 0.00000000  |
| C | 4.96263300  | -0.84138400 | 0.00000100  |
| H | 5.98881500  | -1.19241200 | 0.00000000  |
| C | 3.84171000  | -1.63207700 | 0.00000000  |
| H | 3.80334200  | -2.71491900 | 0.00000100  |

**A3**

|   |             |            |            |
|---|-------------|------------|------------|
| C | -4.85066400 | 0.47439600 | 0.00000100 |
|---|-------------|------------|------------|

|   |             |             |             |
|---|-------------|-------------|-------------|
| C | -3.75199200 | 1.29613400  | 0.00000100  |
| C | -2.41011000 | 0.79729100  | 0.00000100  |
| C | -2.24026200 | -0.64284900 | -0.00000100 |
| C | -3.41838400 | -1.45884800 | -0.00000100 |
| C | -4.68437800 | -0.93324500 | -0.00000100 |
| H | -5.84928500 | 0.90264100  | 0.00000000  |
| H | -3.88772700 | 2.37446900  | 0.00000100  |
| H | -3.28322000 | -2.53743500 | -0.00000100 |
| H | -5.55182200 | -1.58658100 | -0.00000100 |
| C | -1.38356500 | 1.77239100  | 0.00000100  |
| C | 0.00179100  | 1.64675900  | 0.00000000  |
| C | 0.78624500  | 0.50011800  | 0.00000000  |
| C | 0.30649700  | -0.91010400 | -0.00000100 |
| C | -1.01285800 | -1.34446300 | -0.00000100 |
| H | -1.74749800 | 2.79780000  | 0.00000100  |
| H | 0.54665600  | 2.59000900  | 0.00000100  |
| H | -1.12379400 | -2.42906100 | -0.00000200 |
| C | 2.20529500  | 0.43596800  | 0.00000000  |
| C | 2.59370600  | -0.95677600 | 0.00000000  |
| C | 1.43212300  | -1.75457300 | 0.00000200  |
| H | 1.39920500  | -2.83776900 | 0.00000400  |
| C | 3.19471000  | 1.44732200  | 0.00000000  |
| C | 4.52508100  | 1.08658600  | -0.00000100 |
| C | 4.90905600  | -0.28585000 | 0.00000000  |
| C | 3.97164800  | -1.29542600 | 0.00000000  |
| H | 2.91205000  | 2.49735500  | 0.00000000  |
| H | 5.29622300  | 1.85184200  | 0.00000000  |
| H | 5.96755600  | -0.53388800 | 0.00000000  |
| H | 4.27803800  | -2.33836600 | 0.00000200  |

#### A4

|   |             |             |             |
|---|-------------|-------------|-------------|
| C | 2.64142400  | -1.64593200 | 0.00003900  |
| C | 1.67569000  | -0.65481300 | -0.00007500 |
| C | 1.91126300  | 0.81172200  | -0.00014400 |
| C | 3.22405900  | 1.41163100  | -0.00020900 |
| C | 4.48305200  | 0.88095600  | 0.00002800  |
| C | 4.87649700  | -0.49259000 | 0.00020600  |
| C | 4.06506500  | -1.59400800 | 0.00017500  |
| C | 0.30668600  | -1.11017700 | -0.00013300 |
| C | -0.74083100 | -0.24224300 | -0.00006500 |
| C | -0.51120100 | 1.21230200  | -0.00002500 |
| C | 0.83051300  | 1.67403400  | -0.00013800 |
| C | -2.18242700 | -0.44402500 | -0.00004800 |
| C | -2.78026800 | 0.85463600  | 0.00002800  |

|   |             |             |             |
|---|-------------|-------------|-------------|
| C | -1.73046600 | 1.85437600  | 0.00029100  |
| C | -2.96841200 | -1.59474700 | -0.00007200 |
| C | -4.35958800 | -1.46432000 | -0.00002800 |
| C | -4.95109400 | -0.19183900 | 0.00004900  |
| C | -4.17552700 | 0.96932000  | 0.00007900  |
| H | 2.24085000  | -2.65849500 | -0.00000100 |
| H | 3.18828900  | 2.50050400  | -0.00044000 |
| H | 5.29955800  | 1.59955300  | 0.00000500  |
| H | 5.94921700  | -0.67550300 | 0.00032800  |
| H | 4.55780800  | -2.56376300 | 0.00024800  |
| H | 0.13525400  | -2.18441700 | -0.00025900 |
| H | 1.01896400  | 2.74530600  | -0.00016900 |
| H | -1.89174900 | 2.92637800  | 0.00045100  |
| H | -2.51151900 | -2.58196000 | -0.00017500 |
| H | -4.98694900 | -2.35120400 | -0.00004900 |
| H | -6.03521000 | -0.10905800 | 0.00011200  |
| H | -4.65111900 | 1.94696200  | 0.00021400  |

**A5**

|   |             |             |             |
|---|-------------|-------------|-------------|
| C | -4.91241500 | -0.06087700 | 0.00000100  |
| C | -3.97948800 | 0.96601100  | 0.00000000  |
| C | -3.12106700 | -1.66070000 | 0.00000000  |
| C | -4.48041400 | -1.39287200 | 0.00000100  |
| H | -5.97377100 | 0.17151800  | 0.00000100  |
| H | -4.32048100 | 1.99800400  | 0.00000100  |
| H | -2.78051500 | -2.69306200 | 0.00000000  |
| H | -5.19877000 | -2.20724300 | 0.00000100  |
| C | 1.99023000  | 1.48083600  | 0.00000000  |
| C | 3.10559900  | 0.61239500  | 0.00000000  |
| C | 2.87243200  | -0.84635400 | 0.00000000  |
| C | 1.59855000  | -1.32729000 | -0.00000100 |
| H | 2.15611900  | 2.55631200  | 0.00000000  |
| H | 1.41090200  | -2.39912100 | -0.00000100 |
| C | 4.47270100  | 0.80917500  | 0.00000000  |
| H | 4.98907500  | 1.76211900  | 0.00000100  |
| C | 5.11072700  | -0.48740700 | 0.00000100  |
| H | 6.18520000  | -0.63904100 | 0.00000200  |
| C | 4.16469200  | -1.48681500 | 0.00000000  |
| H | 4.34223700  | -2.55509300 | -0.00000100 |
| C | -2.58847100 | 0.72424100  | 0.00000000  |
| C | -1.72409300 | 1.88256600  | -0.00000100 |
| C | -0.36855700 | 1.98993100  | 0.00000000  |
| C | -2.14522400 | -0.63445100 | 0.00000000  |
| C | 0.68813600  | 1.01244800  | 0.00000000  |

|   |             |             |             |
|---|-------------|-------------|-------------|
| C | -0.77383600 | -1.07960400 | -0.00000100 |
| C | 0.44874200  | -0.44620600 | -0.00000100 |
| H | -2.26353700 | 2.82764700  | -0.00000100 |
| H | 0.00305100  | 3.01401600  | -0.00000100 |
| H | -0.69897500 | -2.16621800 | -0.00000100 |

**A6**

|   |             |             |             |
|---|-------------|-------------|-------------|
| C | 4.37230900  | 1.23436500  | 0.00013300  |
| C | 3.04809100  | 1.56058600  | 0.00023500  |
| C | 4.97611000  | -0.06568700 | -0.00038800 |
| C | 4.35206400  | -1.28267400 | -0.00055900 |
| C | 2.95487000  | -1.56286000 | -0.00007100 |
| H | 5.06836100  | 2.06996100  | 0.00059700  |
| H | 2.83720100  | 2.62944700  | 0.00094200  |
| H | 6.06423200  | -0.07652400 | -0.00045900 |
| H | 4.99474500  | -2.16025200 | -0.00071200 |
| H | 2.71645600  | -2.62510300 | -0.00006100 |
| C | 1.84831500  | 0.75131400  | 0.00013600  |
| C | 0.63888600  | 1.41057600  | 0.00010300  |
| C | -0.63530400 | 0.76625600  | 0.00007400  |
| C | -0.63272000 | -0.70036300 | 0.00023600  |
| C | 0.56905100  | -1.37085600 | 0.00033300  |
| C | 1.84860400  | -0.72683400 | 0.00015200  |
| H | -1.83159400 | 2.54102200  | -0.00012200 |
| H | 0.64451200  | 2.49886000  | 0.00007500  |
| C | -1.83655000 | 1.45279700  | -0.00008100 |
| C | -1.88265500 | -1.41711500 | 0.00024300  |
| H | 0.55694800  | -2.45886300 | 0.00041600  |
| C | -3.06093300 | -0.73169500 | 0.00006700  |
| C | -3.06576800 | 0.75159400  | -0.00013500 |
| H | -1.85681000 | -2.50521800 | 0.00045000  |
| C | -4.44260100 | -1.16512700 | -0.00005800 |
| C | -5.22113100 | -0.03430500 | -0.00008600 |
| C | -4.38942600 | 1.15108100  | -0.00049400 |
| H | -4.78047500 | -2.19392200 | 0.00039200  |
| H | -6.30624200 | -0.01730300 | 0.00009000  |
| H | -4.75459900 | 2.17158600  | -0.00064100 |

**B1**

|   |            |             |             |
|---|------------|-------------|-------------|
| C | 4.09448300 | -1.40577800 | -0.06722500 |
| C | 2.87428100 | -2.04183200 | -0.20308000 |
| C | 1.56779500 | -1.50015900 | -0.17409300 |
| C | 4.36505300 | -0.02922100 | 0.08978900  |
| C | 1.15227800 | -0.19304000 | -0.00500300 |

|   |             |             |             |
|---|-------------|-------------|-------------|
| C | 3.46550500  | 1.01877100  | 0.12972700  |
| C | 2.05650000  | 1.00314200  | 0.07066000  |
| H | 4.96998400  | -2.05209100 | -0.10119900 |
| H | 2.91631500  | -3.11935800 | -0.34729600 |
| H | 0.78833000  | -2.23677500 | -0.33011200 |
| H | 5.41619500  | 0.24006400  | 0.16547900  |
| H | 3.90016000  | 2.01415300  | 0.21945200  |
| C | -0.19574100 | 0.31597900  | 0.01454600  |
| C | -0.10320900 | 1.74159600  | 0.01788500  |
| C | 1.25919100  | 2.13604400  | 0.07056000  |
| H | 1.61788900  | 3.15854800  | 0.10157400  |
| C | -1.49430500 | -0.31423700 | 0.03395000  |
| C | -2.64621200 | 0.53905900  | -0.07372600 |
| C | -2.49199800 | 1.96399300  | -0.12516600 |
| C | -1.26447700 | 2.55823000  | -0.05315000 |
| H | -0.90558600 | -2.37642900 | 0.37342500  |
| C | -1.73253300 | -1.70292500 | 0.19169400  |
| C | -3.94105900 | -0.02904600 | -0.09597800 |
| H | -3.39187300 | 2.57025800  | -0.20071600 |
| H | -1.16519100 | 3.64045700  | -0.06577600 |
| C | -4.13115800 | -1.39227500 | 0.01375300  |
| C | -3.01222200 | -2.22899600 | 0.17683500  |
| H | -4.79576400 | 0.63734500  | -0.18942800 |
| H | -5.13277200 | -1.81260100 | -0.00248600 |
| H | -3.15071400 | -3.29940300 | 0.30520800  |

**B2**

|   |             |             |             |
|---|-------------|-------------|-------------|
| C | -1.55008000 | 2.38804200  | 0.15715100  |
| C | -2.83064000 | 1.97037400  | 0.44033400  |
| C | -3.32577700 | 0.65235600  | 0.44139200  |
| C | -0.33025100 | 1.67912800  | -0.05700600 |
| C | -2.64883500 | -0.50251900 | 0.12186100  |
| C | -0.12662100 | 0.25856900  | -0.03356100 |
| C | -1.18817300 | -0.69881900 | -0.17053200 |
| H | -1.42534900 | 3.46953700  | 0.13476900  |
| H | -3.55631800 | 2.75535200  | 0.64030200  |
| H | -4.39037600 | 0.54002700  | 0.64437900  |
| C | -3.29199800 | -1.75706000 | -0.07516500 |
| H | -4.35384500 | -1.92887000 | 0.05432900  |
| C | -2.35136200 | -2.65414600 | -0.54695500 |
| H | -2.54548100 | -3.67607100 | -0.85475200 |
| C | -1.07780400 | -2.02499100 | -0.59618100 |
| H | -0.17927400 | -2.49870600 | -0.96416100 |
| C | 3.96682200  | -1.07690600 | 0.21410800  |

|   |            |             |             |
|---|------------|-------------|-------------|
| C | 3.67780500 | 0.21676100  | -0.17023200 |
| C | 2.34441700 | 0.68630900  | -0.20973500 |
| C | 1.26208000 | -0.20509900 | 0.07131300  |
| C | 1.60457000 | -1.50228900 | 0.53425900  |
| C | 2.91833600 | -1.92892500 | 0.60629500  |
| H | 2.88883600 | 2.73690100  | -0.68936900 |
| H | 4.99659000 | -1.42184700 | 0.25150400  |
| H | 4.47791400 | 0.90982500  | -0.41915300 |
| C | 2.06673100 | 2.06470000  | -0.45808000 |
| H | 0.81979800 | -2.16085600 | 0.88160100  |
| H | 3.13855600 | -2.92378500 | 0.98353700  |
| C | 0.80091500 | 2.53431700  | -0.31185300 |
| H | 0.60814900 | 3.59968200  | -0.40747100 |

**B3**

|   |             |             |             |
|---|-------------|-------------|-------------|
| C | -2.71436100 | 1.57797700  | -0.29248800 |
| C | -2.42066600 | 0.20248100  | -0.14513100 |
| C | -1.11632900 | -0.40287300 | 0.08520500  |
| C | -1.92346400 | 2.71013800  | -0.15683100 |
| C | 0.13654300  | 0.26827900  | 0.02495200  |
| C | -0.55275100 | 2.77715300  | 0.09060200  |
| C | 0.37852100  | 1.74232600  | 0.15270800  |
| H | -2.44043000 | 3.66241600  | -0.24977000 |
| H | -0.13679700 | 3.77872200  | 0.19599000  |
| C | 1.43898200  | -0.31708200 | -0.04061900 |
| C | 2.42159500  | 0.73482000  | 0.14309400  |
| C | 1.75632700  | 1.96442000  | 0.27818400  |
| H | 2.22102900  | 2.93678400  | 0.39104300  |
| C | 1.90936600  | -1.62793600 | -0.33381700 |
| C | 3.26330700  | -1.88550200 | -0.36021500 |
| C | 4.21406200  | -0.85802000 | -0.10815000 |
| C | 3.80688700  | 0.43592000  | 0.12486900  |
| H | 1.22073700  | -2.42424400 | -0.59104100 |
| H | 3.61413400  | -2.88596700 | -0.59823900 |
| H | 5.27391900  | -1.09890200 | -0.13024700 |
| H | 4.53314400  | 1.23038500  | 0.27738300  |
| C | -3.50706200 | -2.00437700 | 0.01657100  |
| C | -2.26008700 | -2.57445900 | 0.37293400  |
| C | -1.12717300 | -1.80292000 | 0.40632800  |
| C | -3.56811400 | -0.65660300 | -0.21280400 |
| H | -4.40248100 | -2.61688500 | -0.02986500 |
| H | -2.20203600 | -3.62496000 | 0.64578600  |
| H | -0.20494500 | -2.25185000 | 0.74602000  |
| H | -4.52642500 | -0.19156200 | -0.42974400 |



|           |             |             |             |
|-----------|-------------|-------------|-------------|
| H         | -3.76335800 | 1.78361000  | -0.49966900 |
| <b>B4</b> |             |             |             |
| C         | 2.09624900  | 0.92235100  | -0.02186700 |
| C         | 1.72794700  | 2.31543400  | -0.00164500 |
| C         | 1.01696500  | -0.08595900 | 0.07246600  |
| C         | -0.30240700 | 0.35555900  | 0.02032200  |
| C         | -0.62444800 | 1.78584300  | 0.04252400  |
| C         | 0.43062900  | 2.73577400  | 0.04572100  |
| C         | -1.58905300 | -0.34151600 | -0.01408600 |
| C         | -2.61309800 | 0.66607200  | 0.03916800  |
| C         | -1.99268900 | 1.96068600  | 0.07677600  |
| C         | -1.97301800 | -1.68372500 | -0.14987300 |
| C         | -3.32692900 | -2.02072100 | -0.17177800 |
| C         | -4.31970200 | -1.03290100 | -0.07440400 |
| C         | -3.96925800 | 0.30985900  | 0.01986700  |
| C         | 3.45691000  | 0.66300300  | -0.16097900 |
| C         | 4.19996300  | -0.53987400 | -0.23314100 |
| C         | 3.76042400  | -1.82700700 | -0.05091200 |
| C         | 2.43348300  | -2.22950500 | 0.26167500  |
| C         | 1.28674800  | -1.48273800 | 0.31795700  |
| H         | 2.53230000  | 3.04504000  | -0.03292000 |
| H         | 0.19973700  | 3.79838700  | 0.07029300  |
| H         | -2.51616100 | 2.90932700  | 0.11480200  |
| H         | -1.24212100 | -2.47546400 | -0.27404600 |
| H         | -3.61429500 | -3.06350700 | -0.27669200 |
| H         | -5.36795800 | -1.31978300 | -0.09229200 |
| H         | -4.73623400 | 1.07930400  | 0.06676600  |
| H         | 4.06751500  | 1.55921000  | -0.25679800 |
| H         | 5.26271000  | -0.41034500 | -0.42782000 |
| H         | 4.50293900  | -2.61948000 | -0.11072100 |
| H         | 2.31028300  | -3.28647200 | 0.49048800  |
| H         | 0.40898300  | -2.04002100 | 0.62221500  |
| <b>B5</b> |             |             |             |
| C         | -2.79771300 | -0.08599100 | 0.04925500  |
| C         | -1.42585900 | -0.55462700 | -0.19702600 |
| C         | -0.32718700 | 0.26157200  | 0.02698000  |
| C         | -0.60338600 | 1.68791400  | 0.28542000  |
| C         | -1.95036500 | 2.08385500  | 0.63809100  |
| C         | -3.01055100 | 1.23331100  | 0.52844800  |
| H         | -2.10464900 | 3.12057100  | 0.92393900  |
| H         | -4.01622800 | 1.57102100  | 0.76865400  |
| C         | 1.10982300  | -1.61974600 | 0.70952500  |

|   |             |             |             |
|---|-------------|-------------|-------------|
| C | 2.29335800  | -2.33858200 | 0.77274300  |
| C | 3.46996900  | -1.78889800 | 0.24835900  |
| C | 3.43937800  | -0.50373600 | -0.25766900 |
| H | 0.20651300  | -2.05430700 | 1.11980000  |
| H | 2.30127100  | -3.32350400 | 1.23105900  |
| H | 4.40089500  | -2.34847600 | 0.26814200  |
| H | 4.35649600  | -0.04711000 | -0.62077200 |
| C | 2.43098400  | 1.64707600  | -0.68518500 |
| C | 1.60404200  | 2.71089000  | -0.46793200 |
| C | 0.29805400  | 2.72063500  | 0.08649100  |
| C | 2.25552800  | 0.27796400  | -0.27966700 |
| C | 1.02675300  | -0.32505300 | 0.14260000  |
| H | 3.40376200  | 1.87244400  | -1.11780400 |
| H | 1.99706200  | 3.68937200  | -0.73686100 |
| H | -0.10105600 | 3.71572400  | 0.27580000  |
| C | -3.66262200 | -1.12583800 | -0.23411600 |
| H | -4.74267900 | -1.10273500 | -0.14206600 |
| C | -2.88277500 | -2.24707900 | -0.69240900 |
| H | -3.29587400 | -3.19289300 | -1.02582800 |
| C | -1.54645900 | -1.92504700 | -0.66458800 |
| H | -0.73136200 | -2.55182400 | -0.99998200 |

**B6**

|   |             |             |             |
|---|-------------|-------------|-------------|
| C | 1.94179000  | 0.98779800  | -0.09430000 |
| C | 1.53063100  | 2.35004000  | -0.11104500 |
| C | 0.21151400  | 2.69632700  | 0.00997200  |
| C | -0.82821100 | 1.73212600  | 0.06504300  |
| C | -0.48002000 | 0.31857400  | -0.00294800 |
| C | 0.90294900  | -0.04171400 | 0.08226700  |
| C | -2.16313800 | 2.14939200  | 0.18583900  |
| C | -3.21173400 | 1.22788200  | 0.20632600  |
| C | -2.94904800 | -0.12677300 | 0.05323300  |
| C | -1.56448400 | -0.61214000 | -0.09881000 |
| C | -3.82369800 | -1.23813300 | -0.07103000 |
| C | -3.03996400 | -2.35694400 | -0.33174600 |
| C | -1.66508500 | -1.99184300 | -0.35410200 |
| C | 1.22151800  | -1.37015500 | 0.47619300  |
| C | 2.40566400  | -2.08887100 | 0.49329000  |
| C | 3.68687300  | -1.69351500 | 0.07021900  |
| C | 4.08173700  | -0.41623300 | -0.28982300 |
| C | 3.31121900  | 0.75626300  | -0.28765500 |
| H | 2.29019900  | 3.11938300  | -0.21545300 |
| H | -0.06727200 | 3.74762300  | 0.03377800  |
| H | -2.36960300 | 3.21358900  | 0.26376300  |

|   |             |             |             |
|---|-------------|-------------|-------------|
| H | -4.23677800 | 1.57813100  | 0.31040800  |
| H | -4.90523800 | -1.19922800 | -0.01830900 |
| H | -3.41078400 | -3.36084300 | -0.51101500 |
| H | -0.86303400 | -2.67371800 | -0.60450300 |
| H | 0.36236100  | -1.92246200 | 0.84417500  |
| H | 2.32305500  | -3.10834500 | 0.86381300  |
| H | 4.45597100  | -2.46311600 | 0.06888600  |
| H | 5.12910300  | -0.28568000 | -0.55244300 |
| H | 3.88093600  | 1.66218900  | -0.48864100 |

**B4a**

|   |             |             |             |
|---|-------------|-------------|-------------|
| C | -2.07316800 | 0.92736500  | 0.00004100  |
| C | -0.99550000 | -0.08131500 | 0.00026300  |
| C | 0.32175100  | 0.37544700  | 0.00024600  |
| C | 0.65531400  | 1.79787600  | 0.00011500  |
| C | 1.59988400  | -0.32327100 | 0.00006300  |
| C | 2.63664800  | 0.67158900  | 0.00005400  |
| H | -0.29749700 | -2.07456000 | 0.00037700  |
| C | -1.22254700 | -1.50333500 | 0.00024200  |
| H | -2.22841200 | -3.32572300 | 0.00044000  |
| C | -2.37574200 | -2.24738300 | 0.00027600  |
| H | -4.47881900 | -2.61116800 | 0.00026600  |
| C | -3.72913400 | -1.82280400 | 0.00013600  |
| H | -5.26964400 | -0.39490100 | -0.00038500 |
| C | -4.18969100 | -0.52730400 | -0.00020200 |
| H | -4.05848400 | 1.56985800  | -0.00067100 |
| C | -3.44295000 | 0.67173300  | -0.00032200 |
| H | -2.50514800 | 3.05073200  | -0.00022100 |
| C | -1.70039600 | 2.32076900  | -0.00010800 |
| H | -0.17680200 | 3.80978600  | 0.00000600  |
| C | -0.40298900 | 2.74586700  | -0.00003300 |
| H | 2.55532400  | 2.91779400  | 0.00063200  |
| C | 2.02941800  | 1.97000700  | 0.00039100  |
| H | 4.79240900  | 0.94185100  | -0.00010100 |
| C | 3.96711600  | 0.23357300  | -0.00016200 |
| H | 5.21273600  | -1.53077600 | -0.00043500 |
| C | 4.20002800  | -1.13791700 | -0.00033300 |
| H | 3.28962500  | -3.10193000 | -0.00044800 |
| C | 3.11249200  | -2.02769600 | -0.00036300 |
| N | 1.83164300  | -1.64431100 | -0.00018300 |

**B4b**

|   |            |             |             |
|---|------------|-------------|-------------|
| C | 2.07427077 | 0.92813764  | -0.01400720 |
| C | 1.03085475 | -0.12284168 | 0.03205541  |

|   |             |             |             |
|---|-------------|-------------|-------------|
| C | -0.30436603 | 0.28319742  | 0.00638299  |
| C | -0.66815887 | 1.69974632  | 0.02549703  |
| C | -1.59198448 | -0.39326173 | -0.01049184 |
| C | -2.55361462 | 0.67089212  | 0.02303989  |
| C | -2.04915958 | -1.71827732 | -0.08242874 |
| C | -3.42019672 | -1.96976301 | -0.08921188 |
| C | -4.35248361 | -0.91852042 | -0.03362929 |
| C | -3.92864839 | 0.40469019  | 0.01714659  |
| H | -1.36861693 | -2.56103308 | -0.15567010 |
| H | -3.77254380 | -2.99625092 | -0.14499220 |
| H | -5.41532120 | -1.14598224 | -0.04061108 |
| H | -4.63370400 | 1.23000669  | 0.04570808  |
| H | 0.45037219  | -2.13404802 | 0.30288297  |
| C | 1.33008456  | -1.52011306 | 0.15344547  |
| H | 2.40435478  | -3.30476293 | 0.24450472  |
| C | 2.50815255  | -2.22767350 | 0.13177225  |
| H | 4.61241314  | -2.51862926 | -0.04495694 |
| C | 3.83487723  | -1.75836429 | -0.02028396 |
| H | 5.31197886  | -0.27585111 | -0.21114141 |
| C | 4.24214360  | -0.44768664 | -0.11613835 |
| H | 4.03014457  | 1.64060799  | -0.13293072 |
| C | 3.45031426  | 0.72057922  | -0.08392684 |
| H | 2.44282037  | 3.06077444  | -0.02030996 |
| C | 1.66127619  | 2.30649371  | -0.00201409 |
| H | 0.06554731  | 3.73752505  | 0.04322645  |
| C | 0.35057995  | 2.68959379  | 0.02761627  |
| N | -1.97301353 | 1.92952440  | 0.04647828  |

**αF-B4a**

|   |             |             |             |
|---|-------------|-------------|-------------|
| C | 1.60373800  | 1.35301300  | -0.00009100 |
| C | 0.68423400  | 0.20044800  | 0.00001400  |
| C | -0.68467200 | 0.45789500  | 0.00000000  |
| C | -1.22405100 | 1.81784100  | -0.00010400 |
| C | -1.84596500 | -0.42174300 | 0.00006100  |
| C | -3.01674500 | 0.40960900  | 0.00001700  |
| H | 0.27773500  | -1.87518100 | 0.00027000  |
| C | 1.11127500  | -1.17669300 | 0.00014600  |
| C | 2.35321400  | -1.75071000 | 0.00012600  |
| C | 3.61554400  | -1.11159000 | -0.00003000 |
| C | 3.91144900  | 0.22640700  | -0.00014000 |
| C | 2.99640500  | 1.29818200  | -0.00014200 |
| C | 1.03191800  | 2.67691100  | -0.00016600 |
| C | -0.31350000 | 2.90924800  | -0.00017600 |
| H | -3.26813200 | 2.64355400  | -0.00014000 |

|   |             |             |             |
|---|-------------|-------------|-------------|
| C | -2.60750100 | 1.78433400  | -0.00008600 |
| H | -5.18893100 | 0.35679800  | 0.00004200  |
| C | -4.26762300 | -0.22094100 | 0.00007600  |
| H | -5.23819300 | -2.14990800 | 0.00022400  |
| C | -4.29458200 | -1.61187400 | 0.00017600  |
| H | -3.10408300 | -3.42045000 | 0.00029500  |
| C | -3.08798300 | -2.33199700 | 0.00021500  |
| N | -1.87841000 | -1.76232400 | 0.00015800  |
| H | 4.96853700  | 0.47598700  | -0.00023200 |
| H | 2.40083900  | -2.83650600 | 0.00024200  |
| H | 3.47732100  | 2.27425600  | -0.00021500 |
| H | 1.72177300  | 3.51641200  | -0.00022500 |
| H | -0.69122000 | 3.92907500  | -0.00023500 |
| F | 4.66692300  | -1.95864400 | -0.00005600 |

**βF-B4a**

|   |             |             |             |
|---|-------------|-------------|-------------|
| C | -2.14102700 | 0.98852800  | -0.00002100 |
| C | -1.18923400 | -0.13920100 | -0.00005900 |
| C | 0.17150400  | 0.15903200  | -0.00003300 |
| C | 0.65737200  | 1.53746700  | 0.00001200  |
| C | 1.36194100  | -0.68420600 | 0.00001100  |
| C | 2.51316500  | 0.17458100  | -0.00001200 |
| H | -0.73190100 | -2.20362000 | -0.00012000 |
| C | -1.58258400 | -1.52731100 | -0.00005900 |
| H | -2.79365400 | -3.21763300 | -0.00003700 |
| C | -2.81369000 | -2.12942800 | -0.00001200 |
| C | -4.11064000 | -1.54935900 | 0.00005100  |
| C | -4.41390000 | -0.20997400 | 0.00006300  |
| H | -4.03734700 | 1.85822000  | 0.00004100  |
| C | -3.53082500 | 0.89458600  | 0.00002200  |
| H | -2.32513900 | 3.14923500  | 0.00003800  |
| C | -1.60915200 | 2.33227500  | 0.00002000  |
| H | 0.08070000  | 3.63534900  | 0.00004700  |
| C | -0.27329100 | 2.60804300  | 0.00003300  |
| C | 2.03498000  | 1.51793300  | -0.00002700 |
| H | 4.68283400  | 0.21551900  | -0.00003200 |
| C | 3.78784600  | -0.40038400 | -0.00001400 |
| H | 4.81924000  | -2.29700600 | -0.00000400 |
| C | 3.85933000  | -1.78922900 | 0.00000300  |
| H | 2.72833600  | -3.63444600 | 0.00003700  |
| C | 2.67509200  | -2.54723100 | 0.00003300  |
| N | 1.44516600  | -2.02181700 | 0.00003500  |
| H | -4.94705500 | -2.24477900 | 0.00008800  |
| H | -5.47055800 | 0.04971600  | 0.00010900  |

|   |            |            |             |
|---|------------|------------|-------------|
| F | 2.83300600 | 2.60282300 | -0.00005300 |
|---|------------|------------|-------------|

**$\alpha$ Cl-B4a**

|    |             |             |             |
|----|-------------|-------------|-------------|
| C  | 1.09755600  | 1.64213200  | -0.00005600 |
| C  | 0.32133800  | 0.38953300  | 0.00003100  |
| C  | -1.06738400 | 0.48426200  | 0.00001900  |
| C  | -1.76179600 | 1.77101100  | -0.00007000 |
| C  | -2.11836300 | -0.52561300 | 0.00010600  |
| C  | -3.37843500 | 0.16231000  | 0.00001900  |
| H  | 0.17220600  | -1.71812600 | 0.00038200  |
| C  | 0.91473900  | -0.92352700 | 0.00021500  |
| C  | 2.21509000  | -1.35278800 | 0.00016700  |
| C  | 3.40763000  | -0.57912100 | -0.00007400 |
| C  | 3.52515700  | 0.79022600  | -0.00018400 |
| C  | 2.48686400  | 1.74569200  | -0.00011900 |
| C  | 0.37643700  | 2.88994500  | -0.00009000 |
| C  | -0.98741300 | 2.96240700  | -0.00010700 |
| H  | -3.88861300 | 2.35188300  | -0.00015000 |
| C  | -3.13215200 | 1.57569600  | -0.00008200 |
| H  | -5.52963700 | -0.14339500 | -0.00000200 |
| C  | -4.54714900 | -0.60946200 | 0.00006000  |
| H  | -5.28509100 | -2.63910800 | 0.00022200  |
| C  | -4.41111200 | -1.99421500 | 0.00018600  |
| H  | -3.01700400 | -3.65033200 | 0.00036400  |
| C  | -3.12859100 | -2.56754900 | 0.00026600  |
| N  | -1.99345500 | -1.86015800 | 0.00022500  |
| H  | 4.53346100  | 1.19278100  | -0.00033000 |
| H  | 2.36012800  | -2.42892900 | 0.00032400  |
| H  | 2.85349600  | 2.77042400  | -0.00017000 |
| H  | 0.96366600  | 3.80422600  | -0.00012600 |
| H  | -1.48320000 | 3.93053200  | -0.00014900 |
| Cl | 4.90589800  | -1.50673500 | -0.00021400 |

**$\beta$ Cl-B4a**

|   |             |             |             |
|---|-------------|-------------|-------------|
| C | 2.19735300  | -1.12688000 | 0.00001800  |
| C | 1.41923800  | 0.12576400  | 0.00009700  |
| C | 0.02753500  | 0.02759300  | 0.00006400  |
| C | -0.65510200 | -1.26240300 | -0.00000900 |
| C | -1.02431300 | 1.03575900  | -0.00004700 |
| C | -2.28796000 | 0.35553300  | -0.00000800 |
| H | 1.26312700  | 2.23291600  | 0.00010000  |
| C | 2.00722200  | 1.44062900  | 0.00005100  |
| H | 3.45136700  | 2.93892200  | 0.00009200  |
| C | 3.31397000  | 1.85936400  | 0.00005200  |

|    |             |             |             |
|----|-------------|-------------|-------------|
| C  | 4.51098000  | 1.09817000  | 0.00002900  |
| C  | 4.61934800  | -0.27242700 | -0.00005000 |
| H  | 3.94759400  | -2.26331600 | -0.00017700 |
| C  | 3.58699000  | -1.23611100 | -0.00007900 |
| H  | 2.06477900  | -3.29008200 | -0.00012200 |
| C  | 1.47671800  | -2.37671000 | -0.00007300 |
| H  | -0.38540200 | -3.41909000 | -0.00007600 |
| C  | 0.11415600  | -2.45427800 | -0.00006900 |
| C  | -2.02260900 | -1.05018300 | 0.00009500  |
| H  | -4.43725600 | 0.64156300  | -0.00000800 |
| C  | -3.46050700 | 1.11732100  | -0.00005500 |
| H  | -4.19954200 | 3.14531200  | -0.00014700 |
| C  | -3.32506200 | 2.50141600  | -0.00013200 |
| H  | -1.93207500 | 4.15840000  | -0.00022800 |
| C  | -2.04216200 | 3.07549900  | -0.00018900 |
| N  | -0.90595900 | 2.37118200  | -0.00014500 |
| H  | 5.43950200  | 1.66493900  | 0.00006400  |
| H  | 5.62779200  | -0.68075600 | -0.00009400 |
| Cl | -3.24899700 | -2.28678900 | 0.00020200  |

**$\alpha$ Br-B4a**

|   |             |             |             |
|---|-------------|-------------|-------------|
| C | 0.29411500  | 1.87918500  | -0.00005600 |
| C | -0.34324800 | 0.55020900  | 0.00004500  |
| C | -1.73397700 | 0.49562800  | 0.00003600  |
| C | -2.56243900 | 1.70023000  | -0.00006000 |
| C | -2.67017300 | -0.62132100 | 0.00009600  |
| C | -3.99686000 | -0.07274600 | 0.00005800  |
| H | -0.26573900 | -1.56181400 | 0.00031200  |
| C | 0.38701600  | -0.69189000 | 0.00017600  |
| C | 1.72628600  | -0.97930000 | 0.00014200  |
| C | 2.82693300  | -0.08131800 | -0.00003600 |
| C | 2.79886800  | 1.29218000  | -0.00014000 |
| C | 1.66415400  | 2.13144300  | -0.00011500 |
| C | -0.55657900 | 3.04245600  | -0.00011900 |
| C | -1.92043800 | 2.96775500  | -0.00012600 |
| H | -4.73938500 | 2.04938800  | -0.00008600 |
| C | -3.90392100 | 1.35889300  | -0.00003900 |
| H | -6.10275100 | -0.60758100 | 0.00008800  |
| C | -5.07591300 | -0.96549400 | 0.00011700  |
| H | -5.59138600 | -3.06270800 | 0.00025900  |
| C | -4.79180900 | -2.32759200 | 0.00021200  |
| H | -3.22771700 | -3.82427500 | 0.00032100  |
| C | -3.45503200 | -2.75975000 | 0.00024500  |
| N | -2.40243400 | -1.93470000 | 0.00018700  |

|    |             |             |             |
|----|-------------|-------------|-------------|
| H  | 3.75724200  | 1.80166300  | -0.00025000 |
| H  | 1.98479900  | -2.03363000 | 0.00026400  |
| H  | 1.91914200  | 3.18954700  | -0.00018200 |
| H  | -0.07128300 | 4.01448300  | -0.00017400 |
| H  | -2.51704600 | 3.87698700  | -0.00017800 |
| Br | 4.55855000  | -0.90887300 | -0.00012300 |

**$\beta$ Br-B4a**

|    |             |             |             |
|----|-------------|-------------|-------------|
| C  | -2.38752800 | -1.32603800 | 0.00002500  |
| C  | -1.86941100 | 0.05470400  | -0.00004900 |
| C  | -0.48533300 | 0.23027800  | -0.00002900 |
| C  | 0.43525700  | -0.90169200 | 0.00003700  |
| C  | 0.35067900  | 1.42390700  | 0.00005900  |
| C  | 1.72173300  | 1.00064000  | 0.00004300  |
| H  | -2.12673300 | 2.15175900  | -0.00005100 |
| C  | -2.70212100 | 1.22955400  | -0.00001200 |
| H  | -4.41103500 | 2.41739000  | -0.00005900 |
| C  | -4.06556200 | 1.38541500  | -0.00002000 |
| C  | -5.09070600 | 0.40521900  | -0.00000400 |
| H  | -5.83906400 | -1.55745100 | 0.00011600  |
| C  | -4.92958300 | -0.96038900 | 0.00007700  |
| H  | -3.88270800 | -2.78201200 | 0.00021100  |
| C  | -3.72928400 | -1.70421900 | 0.00011500  |
| H  | -1.83525700 | -3.42195100 | 0.00015000  |
| C  | -1.43696700 | -2.41129900 | 0.00010500  |
| H  | 0.59711900  | -3.06576300 | 0.00009800  |
| C  | -0.08566900 | -2.22049500 | 0.00009600  |
| C  | 1.73456000  | -0.42820700 | -0.00008100 |
| H  | 3.77452800  | 1.68927600  | 0.00006200  |
| C  | 2.72566700  | 1.97305200  | 0.00009900  |
| H  | 3.06060600  | 4.10556900  | 0.00019400  |
| C  | 2.32672300  | 3.30510900  | 0.00016900  |
| H  | 0.64041000  | 4.66257200  | 0.00024600  |
| C  | 0.95696200  | 3.62113000  | 0.00020500  |
| N  | -0.02281100 | 2.71147400  | 0.00015100  |
| H  | -6.11203200 | 0.77980900  | -0.00004500 |
| Br | 3.29935300  | -1.48627300 | -0.00020000 |

**$\alpha$ CF<sub>3</sub>-B4a**

|   |             |             |             |
|---|-------------|-------------|-------------|
| C | -0.36970300 | 1.87497100  | 0.00020700  |
| C | 0.27810800  | 0.54784000  | 0.00004100  |
| C | 1.66795600  | 0.50624700  | -0.00001100 |
| C | 2.48607900  | 1.71676600  | 0.00009300  |
| C | 2.61559300  | -0.60403000 | -0.00016300 |



|   |             |             |             |
|---|-------------|-------------|-------------|
| C | 3.93675800  | -0.04432500 | -0.00014600 |
| H | 0.21309000  | -1.56490200 | -0.00019100 |
| C | -0.44501000 | -0.69987300 | -0.00007100 |
| C | -1.78284400 | -0.98593400 | -0.00005300 |
| C | -2.90369300 | -0.10535800 | 0.00008900  |
| C | -2.86694400 | 1.26741600  | 0.00023300  |
| C | -1.73982300 | 2.11993500  | 0.00028200  |
| C | 0.47284200  | 3.04529400  | 0.00030400  |
| C | 1.83654000  | 2.98045200  | 0.00025100  |
| H | 4.65915700  | 2.08547000  | 0.00005900  |
| C | 3.82997400  | 1.38735200  | 0.00001200  |
| H | 6.04777200  | -0.55652200 | -0.00027100 |
| C | 5.02472700  | -0.92495200 | -0.00027700 |
| H | 5.56031800  | -3.01771800 | -0.00052100 |
| C | 4.75389700  | -2.29026200 | -0.00041600 |
| H | 3.20395200  | -3.80056900 | -0.00052800 |
| C | 3.42170200  | -2.73412100 | -0.00042000 |
| N | 2.36049700  | -1.91895000 | -0.00029700 |
| H | -3.82527400 | 1.77650100  | 0.00032000  |
| H | -2.02813100 | -2.04502500 | -0.00016200 |
| H | -2.00028200 | 3.17654300  | 0.00040300  |
| H | -0.02008600 | 4.01329100  | 0.00042500  |
| H | 2.42732900  | 3.89350400  | 0.00032900  |
| C | -4.24947100 | -0.79592900 | 0.00007700  |
| F | -4.38700700 | -1.59298800 | 1.08525000  |
| F | -4.38707400 | -1.59284100 | -1.08519300 |
| F | -5.28830200 | 0.06395900  | 0.00016900  |

**$\beta$ CF<sub>3</sub>-B4a**

|   |             |             |             |
|---|-------------|-------------|-------------|
| C | 2.38565200  | -1.29362400 | -0.01183500 |
| C | 1.83197100  | 0.07148600  | -0.00817700 |
| C | 0.44025900  | 0.21067200  | -0.01932400 |
| C | -0.45583500 | -0.93646700 | -0.03707600 |
| C | -0.41611000 | 1.38690300  | -0.01356600 |
| C | -1.77575000 | 0.93803400  | -0.03024700 |
| H | 2.03115300  | 2.17168900  | 0.01196700  |
| C | 2.63055200  | 1.26453000  | 0.00945000  |
| H | 4.30999300  | 2.49759200  | 0.03468700  |
| C | 3.99234600  | 1.45693000  | 0.02330400  |
| C | 5.03939100  | 0.50582000  | 0.02443200  |
| H | 5.84176000  | -1.43783900 | 0.01661800  |
| C | 4.91623500  | -0.86636700 | 0.01299000  |
| H | 3.91719800  | -2.71246900 | -0.00756000 |
| C | 3.73780300  | -1.63869100 | -0.00229000 |

|   |             |             |             |
|---|-------------|-------------|-------------|
| H | 1.88477700  | -3.39977800 | -0.02674900 |
| C | 1.46386200  | -2.39829000 | -0.02582600 |
| H | -0.54117800 | -3.11174100 | -0.05259800 |
| C | 0.10711800  | -2.24300400 | -0.04022300 |
| C | -1.77928900 | -0.50044100 | -0.05585700 |
| H | -3.83753700 | 1.61859300  | -0.05058100 |
| C | -2.79105700 | 1.90449800  | -0.03107300 |
| H | -3.15517000 | 4.03004800  | -0.00505300 |
| C | -2.40925700 | 3.24069800  | -0.00790600 |
| H | -0.74226600 | 4.62254200  | 0.02286800  |
| C | -1.04484900 | 3.57695600  | 0.00745500  |
| N | -0.05579000 | 2.67989900  | 0.00322300  |
| H | 6.05070800  | 0.90649100  | 0.03609000  |
| C | -2.99904700 | -1.33969700 | 0.01612300  |
| F | -4.02760000 | -0.79903000 | -0.68837900 |
| F | -3.45942100 | -1.49576800 | 1.28661800  |
| F | -2.80329800 | -2.59232500 | -0.47205900 |

**$\alpha$ CN-B4a**

|   |             |             |             |
|---|-------------|-------------|-------------|
| C | 1.24256100  | 1.59179000  | -0.00004600 |
| C | 0.44753000  | 0.34785100  | 0.00005000  |
| C | -0.93766800 | 0.46697300  | 0.00006100  |
| C | -1.61014600 | 1.76324600  | -0.00000100 |
| C | -2.00759500 | -0.52638800 | 0.00012100  |
| C | -3.25546700 | 0.18159500  | 0.00010800  |
| H | 0.26680000  | -1.75871400 | 0.00035900  |
| C | 1.02109700  | -0.97602300 | 0.00018000  |
| C | 2.31441100  | -1.41977900 | 0.00008000  |
| C | 3.53526400  | -0.67265700 | -0.00017600 |
| C | 3.65353900  | 0.70781500  | -0.00026600 |
| C | 2.63592900  | 1.67885100  | -0.00015700 |
| C | 0.54293700  | 2.84904600  | -0.00005400 |
| C | -0.82113700 | 2.94242000  | -0.00004100 |
| H | -3.72728500 | 2.38000500  | 0.00001100  |
| C | -2.98442600 | 1.59067700  | 0.00003400  |
| H | -5.41175300 | -0.08328700 | 0.00015600  |
| C | -4.43818300 | -0.56736800 | 0.00016700  |
| H | -5.21095300 | -2.58441700 | 0.00028700  |
| C | -4.32632500 | -1.95456600 | 0.00024000  |
| H | -2.96034500 | -3.63314600 | 0.00031100  |
| C | -3.05385500 | -2.54882800 | 0.00025100  |
| N | -1.90553000 | -1.86151800 | 0.00019200  |
| H | 4.66706900  | 1.09987700  | -0.00043400 |
| H | 2.44056600  | -2.49927600 | 0.00020600  |

|   |             |             |             |
|---|-------------|-------------|-------------|
| H | 3.01484800  | 2.69875200  | -0.00021100 |
| H | 1.14348700  | 3.75412200  | -0.00009400 |
| H | -1.30216100 | 3.91769800  | -0.00005800 |
| C | 4.75241400  | -1.43285100 | -0.00033000 |
| N | 5.73616500  | -2.05597500 | -0.00045700 |

**$\beta$ CN-B4a**

|   |             |             |             |
|---|-------------|-------------|-------------|
| C | -2.14061700 | 1.13140000  | -0.00002300 |
| C | -1.34175300 | -0.10610200 | -0.00010300 |
| C | 0.05264500  | 0.01978300  | -0.00006700 |
| C | 0.70297800  | 1.31355900  | 0.00003800  |
| C | 1.12336000  | -0.96855000 | -0.00001300 |
| C | 2.36863400  | -0.26617200 | 0.00000300  |
| H | -1.13632100 | -2.20527100 | -0.00021400 |
| C | -1.89769400 | -1.42876800 | -0.00011300 |
| H | -3.31402800 | -2.95824700 | -0.00009700 |
| C | -3.19876700 | -1.87636400 | -0.00005500 |
| C | -4.40551700 | -1.13982600 | 0.00002500  |
| C | -4.54435400 | 0.23189900  | 0.00005100  |
| H | -3.91537100 | 2.23372500  | 0.00006400  |
| C | -3.53521800 | 1.21372200  | 0.00002200  |
| H | -2.05001900 | 3.29546800  | 0.00012000  |
| C | -1.44681200 | 2.39222200  | 0.00007700  |
| H | 0.40128700  | 3.46485700  | 0.00014400  |
| C | -0.08336700 | 2.49210400  | 0.00010600  |
| C | 2.09438200  | 1.15086400  | -0.00007500 |
| H | 4.52375100  | -0.51412500 | 0.00002900  |
| C | 3.55495600  | -1.00646400 | 0.00003900  |
| H | 4.33086400  | -3.02030100 | 0.00005700  |
| C | 3.44470700  | -2.39270900 | 0.00005200  |
| H | 2.08210400  | -4.07499700 | 0.00005200  |
| C | 2.17234300  | -2.99031400 | 0.00005300  |
| N | 1.02440300  | -2.30684500 | 0.00002100  |
| H | -5.32308900 | -1.72409000 | 0.00006300  |
| H | -5.56153500 | 0.61705700  | 0.00010400  |
| C | 3.05432700  | 2.18664800  | -0.00010800 |
| N | 3.84944800  | 3.04175100  | 0.00001000  |

**$\alpha$ Me-B4a**

|   |             |             |             |
|---|-------------|-------------|-------------|
| C | 1.54692600  | 1.40556800  | -0.00032300 |
| C | 0.65698400  | 0.23381000  | -0.00037500 |
| C | -0.71812800 | 0.45843300  | -0.00011900 |
| C | -1.28741700 | 1.80438600  | 0.00015000  |
| C | -1.85887900 | -0.44760500 | -0.00006100 |

|   |             |             |             |
|---|-------------|-------------|-------------|
| C | -3.04907200 | 0.35723200  | 0.00034300  |
| H | 0.31647700  | -1.84970400 | -0.00177800 |
| C | 1.12895800  | -1.12708100 | -0.00107700 |
| H | 2.41311300  | -2.75500000 | -0.00137100 |
| C | 2.38821000  | -1.66578400 | -0.00080100 |
| C | 3.67405900  | -1.04411100 | 0.00021500  |
| C | 3.87950000  | 0.31962700  | 0.00050100  |
| H | 3.39966800  | 2.35988000  | -0.00009800 |
| C | 2.93864000  | 1.37323500  | -0.00008100 |
| H | 1.61817200  | 3.57240500  | -0.00054300 |
| C | 0.94677400  | 2.71799600  | -0.00038500 |
| H | -0.80594000 | 3.92866200  | -0.00005900 |
| C | -0.40319400 | 2.91828300  | -0.00008800 |
| H | -3.34990600 | 2.58492100  | 0.00060200  |
| C | -2.67044400 | 1.74037600  | 0.00040500  |
| H | -5.21933700 | 0.25665900  | 0.00082900  |
| C | -4.28544700 | -0.30073100 | 0.00052700  |
| H | -5.21325000 | -2.25114500 | 0.00040200  |
| C | -4.28181600 | -1.69215600 | 0.00028100  |
| H | -3.05136300 | -3.47318200 | -0.00031400 |
| C | -3.05933900 | -2.38445300 | -0.00011900 |
| N | -1.86215500 | -1.78861000 | -0.00027200 |
| H | 4.91755100  | 0.64699600  | 0.00120000  |
| C | 4.86788900  | -1.97140300 | 0.00094300  |
| H | 4.85588300  | -2.62632600 | 0.88191500  |
| H | 4.85636100  | -2.62708200 | -0.87947100 |
| H | 5.81242800  | -1.42054900 | 0.00097100  |

**βMe-B4a**

|   |             |             |             |
|---|-------------|-------------|-------------|
| C | -2.13341500 | 1.01950000  | -0.00015000 |
| C | -1.20587200 | -0.12809000 | -0.00001400 |
| C | 0.16084300  | 0.14107000  | 0.00022700  |
| C | 0.69525500  | 1.50144800  | 0.00002600  |
| C | 1.32687700  | -0.73210100 | 0.00010500  |
| C | 2.49073700  | 0.10538900  | -0.00005800 |
| H | -0.79557700 | -2.20165400 | -0.00072300 |
| C | -1.63089500 | -1.50618400 | -0.00040500 |
| H | -2.88106700 | -3.16883000 | -0.00022700 |
| C | -2.87589400 | -2.08039300 | -0.00006700 |
| C | -4.15884100 | -1.47088700 | 0.00041900  |
| C | -4.43294400 | -0.12488000 | 0.00027300  |
| H | -4.00842300 | 1.93442300  | -0.00040600 |
| C | -3.52478600 | 0.95891300  | -0.00017000 |
| H | -2.26116000 | 3.18281000  | -0.00034700 |

|   |             |             |             |
|---|-------------|-------------|-------------|
| C | -1.56722300 | 2.34669900  | -0.00033100 |
| C | -0.22363700 | 2.58626900  | -0.00021700 |
| C | 2.08463700  | 1.48779800  | 0.00008400  |
| H | 4.66392800  | 0.07285800  | -0.00008200 |
| C | 3.74711000  | -0.51205800 | -0.00009700 |
| H | 4.73553100  | -2.43381300 | 0.00001700  |
| C | 3.78753600  | -1.90353100 | -0.00010800 |
| H | 2.61103600  | -3.71981100 | -0.00005500 |
| C | 2.58663200  | -2.63133200 | -0.00006400 |
| N | 1.37143200  | -2.07212600 | 0.00007900  |
| H | -5.01083900 | -2.14735500 | 0.00082300  |
| H | -5.48364200 | 0.15809400  | 0.00050300  |
| H | 0.14075000  | 3.61078400  | -0.00029500 |
| C | 3.01773400  | 2.65875900  | 0.00036600  |
| H | 2.47757700  | 3.61067500  | 0.00041700  |
| H | 3.67428500  | 2.65402200  | 0.88185100  |
| H | 3.67446000  | 2.65433900  | -0.88095300 |

**$\alpha$ OMe-B4a**

|   |             |             |             |
|---|-------------|-------------|-------------|
| C | 1.10098200  | 1.55262100  | 0.00003400  |
| C | 0.28571600  | 0.33243900  | 0.00003900  |
| C | -1.10026900 | 0.46896900  | 0.00000900  |
| C | -1.75387700 | 1.77782200  | -0.00002600 |
| C | -2.18131800 | -0.50793800 | 0.00000400  |
| C | -3.41939100 | 0.22048000  | -0.00003700 |
| H | 0.07126200  | -1.77150800 | 0.00011200  |
| C | 0.83827000  | -1.00065100 | 0.00008700  |
| C | 2.12133100  | -1.46341900 | 0.00008100  |
| C | 3.35867200  | -0.74678200 | 0.00003700  |
| C | 3.50700600  | 0.62711500  | 0.00004500  |
| C | 2.49287900  | 1.60663800  | 0.00005500  |
| C | 0.42068200  | 2.82615100  | 0.00001500  |
| C | -0.93850200 | 2.94428200  | -0.00001700 |
| H | -3.86170200 | 2.42446300  | -0.00008000 |
| C | -3.12938700 | 1.62534000  | -0.00005300 |
| H | -5.57880700 | -0.01946700 | -0.00008500 |
| C | -4.61103200 | -0.51576500 | -0.00005300 |
| H | -5.41283200 | -2.52112500 | -0.00003900 |
| C | -4.51859700 | -1.90422400 | -0.00002800 |
| H | -3.17746600 | -3.60405200 | 0.00003400  |
| C | -3.25496300 | -2.51808500 | 0.00001300  |
| N | -2.09872200 | -1.84632700 | 0.00002800  |
| H | 4.51673300  | 1.02209900  | 0.00012600  |
| H | 2.25116200  | -2.54281900 | 0.00011300  |

|   |             |             |             |
|---|-------------|-------------|-------------|
| H | 2.88829500  | 2.62122400  | 0.00008300  |
| H | 1.03837000  | 3.72047600  | 0.00002100  |
| H | -1.40205100 | 3.92818800  | -0.00003500 |
| O | 4.41560000  | -1.60093600 | 0.00003700  |
| C | 5.74230900  | -1.08942200 | -0.00019500 |
| H | 6.39370100  | -1.96446300 | -0.00033500 |
| H | 5.93807200  | -0.48731100 | -0.89602500 |
| H | 5.93843900  | -0.48735800 | 0.89557000  |

**βOMe-B4a**

|   |             |             |             |
|---|-------------|-------------|-------------|
| C | 2.21649600  | -1.14212400 | -0.06695900 |
| C | 1.44029000  | 0.11221600  | -0.01298800 |
| C | 0.05139500  | 0.01828300  | -0.06844800 |
| C | -0.63333800 | -1.26526900 | -0.16922600 |
| C | -1.00298100 | 1.02614700  | -0.04544400 |
| C | -2.26469000 | 0.34722200  | -0.13918400 |
| H | 1.29095700  | 2.21693100  | 0.11765900  |
| C | 2.03301200  | 1.42326100  | 0.09488600  |
| H | 3.47792000  | 2.91116100  | 0.24725400  |
| C | 3.33817200  | 1.83435800  | 0.17147700  |
| C | 4.53541800  | 1.06926600  | 0.16532300  |
| H | 5.64558900  | -0.71064200 | 0.08808800  |
| C | 4.63894900  | -0.29744600 | 0.07834500  |
| H | 3.96375400  | -2.28234500 | -0.07775100 |
| C | 3.60432300  | -1.25610100 | -0.02340800 |
| H | 2.08073000  | -3.30063600 | -0.21822800 |
| C | 1.49303900  | -2.38780100 | -0.17526700 |
| H | -0.37355200 | -3.41706300 | -0.31319400 |
| C | 0.13125900  | -2.45884600 | -0.22542500 |
| C | -2.00372900 | -1.06651300 | -0.20451800 |
| H | -4.41058600 | 0.65393500  | -0.28304800 |
| C | -3.43274700 | 1.11680000  | -0.17996400 |
| H | -4.17048900 | 3.14606300  | -0.12756200 |
| C | -3.29813700 | 2.49958500  | -0.10081200 |
| H | -1.90679100 | 4.14811800  | 0.07346200  |
| C | -2.01786800 | 3.06714700  | 0.00788800  |
| N | -0.88335500 | 2.35901700  | 0.03015700  |
| H | 5.46417500  | 1.63111300  | 0.23661200  |
| O | -2.93439200 | -2.06200100 | -0.34345900 |
| C | -3.74729300 | -2.29267600 | 0.80942000  |
| H | -4.31274000 | -1.39723200 | 1.09523600  |
| H | -4.44449600 | -3.08986400 | 0.54061800  |
| H | -3.13526900 | -2.61170900 | 1.66324800  |

**$\alpha$ OH-B4a**

|   |             |             |             |
|---|-------------|-------------|-------------|
| C | 1.58711851  | 1.36336369  | 0.00002555  |
| C | 0.67677679  | 0.21115934  | 0.00002997  |
| C | -0.69450927 | 0.45881676  | 0.00000617  |
| C | -1.24099988 | 1.81638096  | -0.00003114 |
| C | -1.85031003 | -0.42728103 | 0.00000802  |
| C | -3.02588459 | 0.39840085  | -0.00002835 |
| H | 0.28641814  | -1.86642565 | 0.00006097  |
| C | 1.11612668  | -1.16324741 | 0.00006236  |
| C | 2.35634248  | -1.73473036 | 0.00004744  |
| C | 3.63903576  | -1.11346756 | 0.00002472  |
| C | 3.90021580  | 0.24305402  | 0.00008983  |
| C | 2.98005837  | 1.30685694  | 0.00006543  |
| C | 1.01133338  | 2.68592892  | -0.00000444 |
| C | -0.33475366 | 2.91260211  | -0.00003447 |
| H | -3.29022704 | 2.63044061  | -0.00007898 |
| C | -2.62459896 | 1.77504222  | -0.00005173 |
| H | -5.19780243 | 0.33224488  | -0.00006109 |
| C | -4.27302678 | -0.24014290 | -0.00003393 |
| H | -5.23306565 | -2.17437535 | -0.00000470 |
| C | -4.29226742 | -1.63117205 | -0.00000302 |
| H | -3.09192930 | -3.43355001 | 0.00005814  |
| C | -3.08173546 | -2.34490083 | 0.00003216  |
| N | -1.87564942 | -1.76831720 | 0.00003726  |
| H | 4.95054636  | 0.53497195  | 0.00019811  |
| H | 2.39656499  | -2.82100605 | 0.00000327  |
| H | 3.45882844  | 2.28459877  | 0.00009315  |
| H | 1.69819472  | 3.52834382  | -0.00000313 |
| H | -0.71738623 | 3.93077719  | -0.00005855 |
| O | 4.65841335  | -2.01520554 | -0.00013738 |
| H | 5.50856699  | -1.54613753 | -0.00059630 |

 **$\beta$ OH-B4a**

|   |             |             |             |
|---|-------------|-------------|-------------|
| C | 2.13978865  | 0.99785142  | 0.00016170  |
| C | 1.19513240  | -0.13475579 | 0.00018456  |
| C | -0.16700314 | 0.15740866  | -0.00001137 |
| C | -0.66586256 | 1.52907342  | -0.00006667 |
| C | -1.35017861 | -0.69362673 | -0.00013155 |
| C | -2.50662069 | 0.16074825  | -0.00011450 |
| H | 0.75446216  | -2.20458863 | 0.00136120  |
| C | 1.59952387  | -1.52190119 | 0.00078852  |
| H | 2.82028457  | -3.20361851 | 0.00093683  |
| C | 2.83376165  | -2.11507953 | 0.00045681  |
| C | 4.12923098  | -1.52802264 | -0.00045712 |

|   |             |             |             |
|---|-------------|-------------|-------------|
| C | 4.42142680  | -0.18675201 | -0.00070386 |
| H | 4.03137257  | 1.87959450  | -0.00020583 |
| C | 3.53129494  | 0.91259562  | -0.00018555 |
| H | 2.30745947  | 3.15933298  | 0.00065798  |
| C | 1.59759251  | 2.33692739  | 0.00046416  |
| H | -0.10112715 | 3.62825658  | 0.00040053  |
| C | 0.25866943  | 2.60297708  | 0.00033183  |
| C | -2.05061736 | 1.52152946  | -0.00026380 |
| H | -4.68747059 | 0.16389714  | 0.00018642  |
| C | -3.77456417 | -0.43010886 | -0.00000397 |
| H | -4.79749032 | -2.33231834 | -0.00013150 |
| C | -3.84001104 | -1.82017092 | -0.00009832 |
| H | -2.69465986 | -3.65556165 | -0.00027642 |
| C | -2.65102184 | -2.56796176 | -0.00010880 |
| N | -1.42563730 | -2.03055772 | -0.00004437 |
| H | 4.96979692  | -2.21837967 | -0.00090031 |
| H | 5.47638661  | 0.08086810  | -0.00131172 |
| O | -2.81868530 | 2.64977321  | -0.00010003 |
| H | -3.75332187 | 2.39384451  | -0.00105886 |

**$\alpha$ NH<sub>2</sub>-B4a**

|   |             |             |             |
|---|-------------|-------------|-------------|
| C | -1.56844200 | 1.38346500  | -0.00285300 |
| C | -0.67079100 | 0.22974000  | -0.00420700 |
| C | 0.70546500  | 0.46214500  | -0.00103600 |
| C | 1.26346400  | 1.81477100  | 0.00153400  |
| C | 1.85056600  | -0.43382500 | -0.00001900 |
| C | 3.03518000  | 0.38197500  | 0.00298300  |
| H | -0.29928600 | -1.84947700 | -0.01562200 |
| C | -1.12347500 | -1.13927600 | -0.01106500 |
| C | -2.36625100 | -1.70324700 | -0.01240400 |
| C | -3.66124500 | -1.09071100 | -0.00198800 |
| C | -3.89395600 | 0.28259100  | 0.00423100  |
| C | -2.96638600 | 1.33057900  | -0.00099300 |
| C | -0.98422300 | 2.70002200  | -0.00101700 |
| C | 0.36502800  | 2.91682000  | 0.00096200  |
| H | 3.32214000  | 2.60976000  | 0.00566700  |
| C | 2.64854400  | 1.76063900  | 0.00385500  |
| H | 5.20679800  | 0.29152200  | 0.00663400  |
| C | 4.27591700  | -0.27113600 | 0.00444300  |
| H | 5.21670200  | -2.21426700 | 0.00381800  |
| C | 4.28118600  | -1.66170600 | 0.00289300  |
| H | 3.06367500  | -3.45320400 | -0.00101600 |
| C | 3.06327300  | -2.36428600 | 0.00014900  |
| N | 1.86343500  | -1.77621200 | -0.00112700 |



|   |             |             |             |
|---|-------------|-------------|-------------|
| H | -4.93942200 | 0.58754700  | 0.00867600  |
| H | -2.38044300 | -2.79279100 | -0.02754000 |
| H | -3.43674600 | 2.31293900  | 0.00308900  |
| H | -1.66427400 | 3.54815800  | -0.00092200 |
| H | 0.75471600  | 3.93235600  | 0.00223100  |
| N | -4.73779100 | -1.94786500 | -0.04083600 |
| H | -4.59337600 | -2.91361000 | 0.21674400  |
| H | -5.65312300 | -1.58175600 | 0.17918200  |

**$\beta$ NH<sub>2</sub>-B4a**

|   |             |             |             |
|---|-------------|-------------|-------------|
| C | -2.13822600 | 1.00565300  | -0.00578300 |
| C | -1.19796300 | -0.12970900 | -0.00068400 |
| C | 0.16448500  | 0.15462900  | -0.00196400 |
| C | 0.68046100  | 1.52163100  | -0.00324300 |
| C | 1.34089000  | -0.70699300 | 0.00259100  |
| C | 2.50153000  | 0.13520900  | -0.00485600 |
| H | -0.77147100 | -2.20490600 | 0.00897000  |
| C | -1.61226400 | -1.51726500 | 0.00625500  |
| H | -2.84187500 | -3.19044900 | 0.01557400  |
| C | -2.84864800 | -2.10172300 | 0.01010800  |
| C | -4.14380100 | -1.50718300 | 0.00687200  |
| C | -4.42727200 | -0.16565300 | -0.00044500 |
| H | -4.02424700 | 1.89995900  | -0.01053500 |
| C | -3.52981900 | 0.92999800  | -0.00593300 |
| H | -2.28842200 | 3.16892400  | -0.01457500 |
| C | -1.58570500 | 2.34041200  | -0.00948700 |
| H | 0.10285200  | 3.62725300  | -0.01857900 |
| C | -0.24424400 | 2.59544900  | -0.00869800 |
| C | 2.07269800  | 1.51076900  | 0.00183500  |
| H | 4.67696400  | 0.12593700  | -0.04810900 |
| C | 3.76390700  | -0.46498500 | -0.02015200 |
| H | 4.77178100  | -2.37676700 | -0.02466200 |
| C | 3.81875600  | -1.85626200 | -0.01251900 |
| H | 2.65756200  | -3.68112900 | 0.01034300  |
| C | 2.62399200  | -2.59300200 | 0.00425400  |
| N | 1.40305900  | -2.04511900 | 0.00892300  |
| H | -4.98768800 | -2.19343000 | 0.01011800  |
| H | -5.48059500 | 0.10893400  | -0.00206900 |
| N | 2.93997000  | 2.59905400  | -0.05533700 |
| H | 2.52792100  | 3.48031600  | 0.22892400  |
| H | 3.82336700  | 2.45196100  | 0.42058700  |

**$\alpha$ NMe<sub>2</sub>-B4a**

|   |             |            |            |
|---|-------------|------------|------------|
| C | -0.65833200 | 1.79888000 | 0.00009800 |
|---|-------------|------------|------------|

|   |             |             |             |
|---|-------------|-------------|-------------|
| C | 0.02765500  | 0.51330600  | 0.00018300  |
| C | 1.42407900  | 0.50531300  | 0.00002200  |
| C | 2.20316300  | 1.74330100  | -0.00022900 |
| C | 2.39863300  | -0.57169600 | 0.00006700  |
| C | 3.70577400  | 0.03080100  | -0.00018900 |
| H | 0.02723700  | -1.59361600 | 0.00105200  |
| C | -0.66096400 | -0.75102000 | 0.00063600  |
| C | -1.98145600 | -1.10419400 | 0.00058400  |
| C | -3.17445800 | -0.29919100 | 0.00007300  |
| C | -3.14366300 | 1.10399200  | 0.00005400  |
| C | -2.04682300 | 1.97232700  | 0.00011900  |
| C | 0.13765700  | 2.99800600  | -0.00007200 |
| C | 1.50488300  | 2.98189100  | -0.00024800 |
| H | 4.36811500  | 2.17654900  | -0.00054900 |
| C | 3.55990100  | 1.45432100  | -0.00036300 |
| H | 5.83024300  | -0.42963900 | -0.00039100 |
| C | 4.81686600  | -0.82507300 | -0.00020200 |
| H | 5.41235000  | -2.90008500 | 0.00004200  |
| C | 4.58480600  | -2.19592400 | 0.00004300  |
| H | 3.07980100  | -3.75388100 | 0.00048200  |
| C | 3.26455900  | -2.68061700 | 0.00028900  |
| N | 2.18247700  | -1.89713900 | 0.00029600  |
| H | -4.09799800 | 1.61498600  | -0.00031100 |
| H | -2.13866200 | -2.17575000 | 0.00115400  |
| H | -2.34644100 | 3.01983900  | 0.00004400  |
| H | -0.38911800 | 3.94906500  | -0.00009000 |
| H | 2.06165300  | 3.91641200  | -0.00039600 |
| N | -4.39019100 | -0.95007400 | -0.00030100 |
| C | -4.47882900 | -2.40762200 | -0.00133500 |
| H | -5.53052300 | -2.69505000 | -0.00302800 |
| H | -4.00981900 | -2.84624800 | -0.89087400 |
| H | -4.01226600 | -2.84755800 | 0.88889400  |
| C | -5.63238900 | -0.18801100 | 0.00065600  |
| H | -5.71631700 | 0.45035600  | -0.88877300 |
| H | -6.47608800 | -0.87831200 | 0.00168000  |
| H | -5.71454000 | 0.45069300  | 0.88996900  |

**$\beta$ NMe<sub>2</sub>-B4a**

|   |             |             |            |
|---|-------------|-------------|------------|
| C | 2.31590900  | -1.25971900 | 0.00000400 |
| C | 1.67664800  | 0.07119500  | 0.00000400 |
| C | 0.28318700  | 0.12055700  | 0.00000800 |
| C | -0.53440900 | -1.08356800 | 0.00001000 |
| C | -0.66055200 | 1.23106300  | 0.00000900 |
| C | -1.98751600 | 0.68017900  | 0.00000600 |

|   |             |             |             |
|---|-------------|-------------|-------------|
| H | 1.74808600  | 2.18187700  | 0.00000400  |
| C | 2.40368200  | 1.31481800  | 0.00000100  |
| H | 4.00055000  | 2.64943400  | -0.00000600 |
| C | 3.74765300  | 1.59080400  | -0.00000500 |
| C | 4.85624700  | 0.70515600  | -0.00001000 |
| H | 5.77451300  | -1.18359400 | -0.00001300 |
| C | 4.81584300  | -0.66887100 | -0.00000900 |
| H | 3.93436100  | -2.57660900 | -0.00000100 |
| C | 3.68555900  | -1.51662400 | -0.00000200 |
| H | 1.95186900  | -3.39612900 | 0.00001700  |
| C | 1.46419200  | -2.42502300 | 0.00001200  |
| H | -0.51116500 | -3.24993600 | 0.00002700  |
| C | 0.10120200  | -2.35260700 | 0.00001700  |
| C | -1.88554500 | -0.76365800 | 0.00001200  |
| H | -4.09328900 | 1.22568600  | -0.00002800 |
| C | -3.06521100 | 1.57636500  | -0.00000900 |
| H | -3.58337400 | 3.67264700  | -0.00002200 |
| C | -2.78225300 | 2.93904900  | -0.00001000 |
| H | -1.21866400 | 4.43590100  | 0.00000100  |
| C | -1.44662100 | 3.37129300  | 0.00000000  |
| N | -0.39514700 | 2.54546500  | 0.00000700  |
| H | 5.84043400  | 1.16871700  | -0.00001500 |
| N | -2.92593400 | -1.73753500 | 0.00000200  |
| C | -3.73616700 | -1.75755300 | 1.21650100  |
| H | -4.40032100 | -0.88127900 | 1.32918000  |
| H | -4.36593200 | -2.65585500 | 1.21466200  |
| H | -3.07887900 | -1.80033900 | 2.08959100  |
| C | -3.73612400 | -1.75759200 | -1.21652600 |
| H | -4.36574000 | -2.65600100 | -1.21479700 |
| H | -4.40042800 | -0.88142300 | -1.32914600 |
| H | -3.07879300 | -1.80018100 | -2.08959400 |

**F-B4b**

|   |             |             |             |
|---|-------------|-------------|-------------|
| C | 1.61358700  | 1.32444200  | -0.01250800 |
| C | 0.71992200  | 0.14556400  | 0.03097000  |
| C | -0.65788200 | 0.36698000  | 0.00495300  |
| C | -1.20842200 | 1.72505300  | 0.02137500  |
| C | -1.84300500 | -0.47505100 | -0.01075800 |
| C | -2.93784600 | 0.45150800  | 0.02126800  |
| C | -2.11916800 | -1.84994400 | -0.07926900 |
| C | -3.44371400 | -2.28258600 | -0.08401900 |
| C | -4.50769400 | -1.36447500 | -0.03015500 |
| C | -4.26474900 | 0.00358700  | 0.01713300  |
| H | -1.33300700 | -2.59541800 | -0.15179400 |

|   |             |             |             |
|---|-------------|-------------|-------------|
| H | -3.65597800 | -3.34693400 | -0.13719600 |
| H | -5.53065100 | -1.73175800 | -0.03577000 |
| H | -5.07387500 | 0.72712200  | 0.04438100  |
| H | 0.41002900  | -1.92877400 | 0.28857700  |
| C | 1.19981200  | -1.20173600 | 0.14812600  |
| H | 2.53249200  | -2.82897600 | 0.24102300  |
| C | 2.45582500  | -1.75055100 | 0.13417700  |
| C | 3.69358300  | -1.08608800 | -0.00519400 |
| H | 4.99710600  | 0.53521400  | -0.17922500 |
| C | 3.95025600  | 0.25831400  | -0.09698100 |
| H | 3.45998700  | 2.29013600  | -0.12155500 |
| C | 3.00653100  | 1.30237600  | -0.07364900 |
| H | 1.69454000  | 3.48640400  | -0.02466900 |
| C | 1.02080800  | 2.63437900  | -0.00599800 |
| H | -0.75072800 | 3.84138100  | 0.03340300  |
| C | -0.32976800 | 2.84034700  | 0.02102400  |
| N | -2.53141000 | 1.77702500  | 0.04186900  |
| F | 4.76461100  | -1.90447700 | -0.02813500 |

**CI-B4b**

|   |             |             |             |
|---|-------------|-------------|-------------|
| C | 1.12029300  | 1.60027600  | -0.00702400 |
| C | 0.36014100  | 0.33210300  | 0.03922900  |
| C | -1.03183400 | 0.40303500  | 0.00713400  |
| C | -1.72538700 | 1.69293100  | 0.01734500  |
| C | -2.11929600 | -0.56276900 | -0.00979200 |
| C | -3.30787600 | 0.23956800  | 0.01572700  |
| C | -2.24367100 | -1.95889800 | -0.07555400 |
| C | -3.51427000 | -2.53234000 | -0.08367300 |
| C | -4.67157700 | -1.73531700 | -0.03605100 |
| C | -4.57853900 | -0.34852200 | 0.00820000  |
| H | -1.38053000 | -2.61404700 | -0.14323000 |
| H | -3.60972500 | -3.61352600 | -0.13454800 |
| H | -5.64855800 | -2.21140400 | -0.04420900 |
| H | -5.46130700 | 0.28321100  | 0.03049600  |
| H | 0.28466900  | -1.75934800 | 0.31992200  |
| C | 0.98899200  | -0.95063000 | 0.16861100  |
| H | 2.45960100  | -2.43222800 | 0.27714700  |
| C | 2.29645900  | -1.36576100 | 0.15711700  |
| C | 3.46917000  | -0.58298800 | 0.00486200  |
| H | 4.55879200  | 1.20283700  | -0.18663000 |
| C | 3.56068000  | 0.78627400  | -0.09434300 |
| H | 2.85501800  | 2.75184800  | -0.12101500 |
| C | 2.50673100  | 1.72219500  | -0.06926000 |
| H | 0.96996800  | 3.75880400  | -0.02328200 |

|    |             |             |             |
|----|-------------|-------------|-------------|
| C  | 0.39163100  | 2.83947900  | -0.00441900 |
| H  | -1.50107300 | 3.84694900  | 0.02656400  |
| C  | -0.97353800 | 2.89771900  | 0.01772400  |
| N  | -3.04634700 | 1.60159300  | 0.03373800  |
| Cl | 4.97817200  | -1.48719900 | -0.03366900 |

**Br-B4b**

|    |             |             |             |
|----|-------------|-------------|-------------|
| C  | 0.32435000  | 1.83410900  | -0.00450800 |
| C  | -0.30380200 | 0.49546600  | 0.04253500  |
| C  | -1.69572800 | 0.42555900  | 0.00798700  |
| C  | -2.51595100 | 1.63872800  | 0.01422000  |
| C  | -2.68015800 | -0.64516300 | -0.00892100 |
| C  | -3.94373700 | 0.03309300  | 0.01243000  |
| C  | -2.66280700 | -2.04679700 | -0.07160900 |
| C  | -3.86906200 | -2.74558900 | -0.08115000 |
| C  | -5.10103400 | -2.06944200 | -0.03782800 |
| C  | -5.14855100 | -0.68024500 | 0.00355500  |
| H  | -1.73777400 | -2.61157000 | -0.13569700 |
| H  | -3.85474700 | -3.83100000 | -0.12967400 |
| H  | -6.02494100 | -2.64174700 | -0.04696700 |
| H  | -6.09061800 | -0.14078500 | 0.02263700  |
| H  | -0.16752700 | -1.59315300 | 0.32531000  |
| C  | 0.45122300  | -0.71706900 | 0.17464000  |
| H  | 2.06280700  | -2.04243900 | 0.28803500  |
| C  | 1.79431300  | -0.99802000 | 0.16647500  |
| C  | 2.88076700  | -0.10029300 | 0.01592700  |
| H  | 3.78485100  | 1.78709300  | -0.17682200 |
| C  | 2.83493900  | 1.27042600  | -0.08542700 |
| H  | 1.93479800  | 3.15489600  | -0.11748400 |
| C  | 1.69156200  | 2.09550100  | -0.06438500 |
| H  | -0.04302000 | 3.96631500  | -0.02516200 |
| C  | -0.52567200 | 2.99336900  | -0.00567400 |
| H  | -2.51062400 | 3.80441000  | 0.01957000  |
| C  | -1.88980600 | 2.91336200  | 0.01364600  |
| N  | -3.82104300 | 1.41457100  | 0.02812000  |
| Br | 4.61568600  | -0.91245700 | -0.02205900 |

**CF<sub>3</sub>-B4b**

|   |             |             |             |
|---|-------------|-------------|-------------|
| C | 0.39809400  | 1.83308700  | 0.00044000  |
| C | -0.23916000 | 0.49564700  | 0.05229500  |
| C | -1.62894100 | 0.43664100  | 0.01124000  |
| C | -2.44183900 | 1.65398800  | 0.01431800  |
| C | -2.62127300 | -0.62940400 | -0.00763200 |
| C | -3.87995500 | 0.05569500  | 0.00995700  |

|   |             |             |             |
|---|-------------|-------------|-------------|
| C | -2.61144900 | -2.02979100 | -0.07224300 |
| C | -3.82323000 | -2.72118600 | -0.08602800 |
| C | -5.05048700 | -2.03837600 | -0.04539600 |
| C | -5.08921800 | -0.64804400 | -0.00305200 |
| H | -1.68939900 | -2.59915900 | -0.13512900 |
| H | -3.81515000 | -3.80655800 | -0.13580100 |
| H | -5.97791700 | -2.60470100 | -0.05773700 |
| H | -6.02772000 | -0.10241200 | 0.01329000  |
| H | -0.11631600 | -1.58974000 | 0.36972800  |
| C | 0.50891400  | -0.72162300 | 0.20109000  |
| H | 2.10804900  | -2.04773500 | 0.32596400  |
| C | 1.84987400  | -1.00112900 | 0.18832500  |
| C | 2.95369200  | -0.12086300 | 0.01571100  |
| H | 3.84909600  | 1.76194000  | -0.20177300 |
| C | 2.89991200  | 1.24717600  | -0.09584900 |
| H | 2.01283000  | 3.14525100  | -0.12404300 |
| C | 1.76395200  | 2.08753800  | -0.06747800 |
| H | 0.04310600  | 3.96856300  | -0.01949500 |
| C | -0.44627200 | 2.99914200  | -0.00014400 |
| H | -2.42627800 | 3.82082200  | 0.02179500  |
| C | -1.80950200 | 2.92699200  | 0.01660000  |
| N | -3.74714400 | 1.43794400  | 0.02566900  |
| C | 4.30541600  | -0.80216500 | -0.02221600 |
| F | 4.52083000  | -1.51307400 | 1.10847400  |
| F | 4.37551300  | -1.67690200 | -1.05128100 |
| F | 5.33016100  | 0.06199500  | -0.15676200 |

**CN-B4b**

|   |             |             |             |
|---|-------------|-------------|-------------|
| C | 1.26466700  | 1.55375100  | -0.00480400 |
| C | 0.48671000  | 0.29278700  | 0.04588600  |
| C | -0.90131000 | 0.38533500  | 0.00910500  |
| C | -1.57592700 | 1.68373100  | 0.01672900  |
| C | -2.00462900 | -0.56582700 | -0.00915800 |
| C | -3.18108200 | 0.25299500  | 0.01343400  |
| C | -2.14858700 | -1.95831000 | -0.07605900 |
| C | -3.42943300 | -2.51219800 | -0.08760300 |
| C | -4.57467300 | -1.69944700 | -0.04224500 |
| C | -4.46077500 | -0.31353300 | 0.00270200  |
| H | -1.29536400 | -2.62599200 | -0.14209600 |
| H | -3.54044600 | -3.59175500 | -0.13918300 |
| H | -5.55836600 | -2.16096500 | -0.05290900 |
| H | -5.33348500 | 0.33189800  | 0.02287800  |
| H | 0.38117200  | -1.79544000 | 0.35157600  |
| C | 1.09752000  | -1.00010300 | 0.18694500  |

|   |             |             |             |
|---|-------------|-------------|-------------|
| H | 2.54432200  | -2.49822100 | 0.29916800  |
| C | 2.39788900  | -1.42939300 | 0.17045500  |
| C | 3.59651900  | -0.67173900 | 0.00292400  |
| H | 4.69107200  | 1.11285600  | -0.20590300 |
| C | 3.68858100  | 0.70662400  | -0.10388800 |
| H | 3.01454800  | 2.68445300  | -0.13187100 |
| C | 2.65382900  | 1.65969600  | -0.07501100 |
| H | 1.14539500  | 3.71338500  | -0.02094600 |
| C | 0.55450100  | 2.80242000  | -0.00168100 |
| H | -1.32583800 | 3.83495000  | 0.02731800  |
| C | -0.81040500 | 2.87915400  | 0.01904500  |
| N | -2.89810300 | 1.61120000  | 0.03127700  |
| C | 4.82380200  | -1.41571100 | -0.03270500 |
| N | 5.81436100  | -2.02642500 | -0.06162800 |

**Me-B4b**

|   |             |             |             |
|---|-------------|-------------|-------------|
| C | 1.55941000  | 1.37473200  | -0.00796100 |
| C | 0.69323600  | 0.17970200  | 0.03489400  |
| C | -0.68847100 | 0.37114700  | 0.00684800  |
| C | -1.26708500 | 1.71524800  | 0.01860100  |
| C | -1.85570200 | -0.49680500 | -0.00886900 |
| C | -2.97028000 | 0.40580100  | 0.01684700  |
| C | -2.10137900 | -1.87707700 | -0.07220300 |
| C | -3.41671900 | -2.33874600 | -0.07966800 |
| C | -4.50045400 | -1.44425100 | -0.03310200 |
| C | -4.28700800 | -0.07075100 | 0.01008400  |
| H | -1.29767600 | -2.60425100 | -0.13731200 |
| H | -3.60545700 | -3.40784600 | -0.12865600 |
| H | -5.51531700 | -1.83352500 | -0.04048900 |
| H | -5.11187200 | 0.63510800  | 0.03241000  |
| H | 0.44200600  | -1.89913800 | 0.29677500  |
| C | 1.21347500  | -1.15211600 | 0.15407700  |
| H | 2.53589300  | -2.75038400 | 0.25229800  |
| C | 2.48405400  | -1.66839300 | 0.13963200  |
| C | 3.74722400  | -1.02419500 | -0.00556200 |
| H | 4.94263100  | 0.69322900  | -0.18411100 |
| C | 3.91639000  | 0.34266200  | -0.09508000 |
| H | 3.38669200  | 2.36790700  | -0.11415600 |
| C | 2.95038900  | 1.37139600  | -0.06772300 |
| H | 1.59832200  | 3.53966200  | -0.02118000 |
| C | 0.94100800  | 2.67479000  | -0.00350300 |
| H | -0.85651600 | 3.84253100  | 0.02867400  |
| C | -0.41267500 | 2.85130500  | 0.01902900  |
| N | -2.59155000 | 1.73988300  | 0.03491300  |

|   |            |             |             |
|---|------------|-------------|-------------|
| C | 4.96145700 | -1.92360400 | -0.04015800 |
| H | 5.02707000 | -2.52953700 | 0.87260100  |
| H | 4.90513900 | -2.62526900 | -0.88230100 |
| H | 5.88872800 | -1.35274200 | -0.13603400 |

**OMe-B4b**

|   |             |             |             |
|---|-------------|-------------|-------------|
| C | 1.12138500  | 1.50836300  | 0.00097200  |
| C | 0.32320900  | 0.27220100  | 0.03940400  |
| C | -1.06728600 | 0.38465200  | 0.00755700  |
| C | -1.72055300 | 1.69655500  | 0.01214200  |
| C | -2.18425700 | -0.54676300 | -0.00940800 |
| C | -3.34707100 | 0.29316100  | 0.00837700  |
| C | -2.35318300 | -1.93927100 | -0.06629700 |
| C | -3.64017600 | -2.47388600 | -0.07615200 |
| C | -4.77170600 | -1.64006200 | -0.03829600 |
| C | -4.63497500 | -0.25671200 | -0.00089200 |
| H | -1.51064900 | -2.62194600 | -0.12396800 |
| H | -3.76899300 | -3.55205800 | -0.12017400 |
| H | -5.76359300 | -2.08482000 | -0.04751500 |
| H | -5.49802800 | 0.40213700  | 0.01532600  |
| H | 0.18497900  | -1.82310100 | 0.28170500  |
| C | 0.91418200  | -1.03288800 | 0.15342300  |
| H | 2.35278600  | -2.55207500 | 0.25324600  |
| C | 2.20466300  | -1.48043000 | 0.14973700  |
| C | 3.42440300  | -0.75002100 | 0.02335200  |
| H | 4.54463000  | 1.03782100  | -0.13258700 |
| C | 3.54456400  | 0.62574300  | -0.06041000 |
| H | 2.88843200  | 2.60413500  | -0.08852000 |
| C | 2.51265400  | 1.58328400  | -0.04496800 |
| H | 1.04200600  | 3.67239900  | -0.02072700 |
| C | 0.43280700  | 2.77266200  | -0.00386400 |
| H | -1.42463000 | 3.84286500  | 0.01448400  |
| C | -0.92848500 | 2.87678200  | 0.01113800  |
| N | -3.04407000 | 1.64659100  | 0.02253900  |
| O | 4.49400000  | -1.58378700 | 0.01411000  |
| C | 5.81073700  | -1.05362100 | -0.09508300 |
| H | 6.47515800  | -1.91845200 | -0.08492900 |
| H | 5.94103800  | -0.50197300 | -1.03380100 |
| H | 6.04788100  | -0.39926900 | 0.75240700  |

**OH-B4b**

|   |             |            |             |
|---|-------------|------------|-------------|
| C | 1.59747500  | 1.33296700 | -0.01010500 |
| C | 0.71278100  | 0.15549300 | 0.02781100  |
| C | -0.66728300 | 0.36810700 | 0.00461300  |



|   |             |             |             |
|---|-------------|-------------|-------------|
| C | -1.22408600 | 1.72412700  | 0.01829800  |
| C | -1.84823300 | -0.47943800 | -0.00957900 |
| C | -2.94742400 | 0.44263100  | 0.01865000  |
| C | -2.11848600 | -1.85621300 | -0.07083700 |
| C | -3.44050800 | -2.29576100 | -0.07479500 |
| C | -4.50871100 | -1.38202400 | -0.02665600 |
| C | -4.27210800 | -0.01279100 | 0.01521000  |
| H | -1.32859700 | -2.59853700 | -0.13644800 |
| H | -3.64756400 | -3.36149000 | -0.12229800 |
| H | -5.53015500 | -1.75391800 | -0.03146600 |
| H | -5.08495100 | 0.70682200  | 0.03933700  |
| H | 0.41764700  | -1.92315200 | 0.25776600  |
| C | 1.20451200  | -1.19003700 | 0.13204900  |
| H | 2.52678600  | -2.81660000 | 0.21786000  |
| C | 2.45839000  | -1.73646100 | 0.12121500  |
| C | 3.71849900  | -1.08881500 | -0.00363900 |
| H | 4.97984500  | 0.59353700  | -0.15510700 |
| C | 3.94039100  | 0.27422600  | -0.08226300 |
| H | 3.44267100  | 2.29907600  | -0.10393400 |
| C | 2.99165200  | 1.30937000  | -0.06178100 |
| H | 1.67309100  | 3.49599400  | -0.02381100 |
| C | 1.00174500  | 2.64167700  | -0.00669400 |
| H | -0.77441000 | 3.84249200  | 0.02646600  |
| C | -0.34946700 | 2.84308900  | 0.01674900  |
| N | -2.54800100 | 1.76989300  | 0.03628400  |
| O | 4.75889900  | -1.96238000 | -0.02182800 |
| H | 5.59560400  | -1.47531700 | -0.09720500 |

**NH<sub>2</sub>-B4b**

|   |             |             |             |
|---|-------------|-------------|-------------|
| C | -1.57970900 | 1.35145000  | -0.00765700 |
| C | -0.70736600 | 0.17347800  | 0.02934500  |
| C | 0.67762400  | 0.37223800  | 0.00554500  |
| C | 1.24475100  | 1.72330900  | 0.01669200  |
| C | 1.84936900  | -0.48447300 | -0.00917100 |
| C | 2.95741700  | 0.42942000  | 0.01626000  |
| C | 2.10811600  | -1.86454200 | -0.06837200 |
| C | 3.42495500  | -2.31674000 | -0.07304800 |
| C | 4.50191400  | -1.41160700 | -0.02772500 |
| C | 4.27829500  | -0.04096800 | 0.01205900  |
| H | 1.31079000  | -2.59957100 | -0.13174300 |
| H | 3.62265200  | -3.38445600 | -0.11897500 |
| H | 5.52003800  | -1.79296500 | -0.03304500 |
| H | 5.09833200  | 0.67068200  | 0.03418700  |
| H | -0.43030700 | -1.90581300 | 0.26022400  |

|   |             |             |             |
|---|-------------|-------------|-------------|
| C | -1.21165300 | -1.16635700 | 0.13436000  |
| H | -2.50996500 | -2.78913900 | 0.23812700  |
| C | -2.46770700 | -1.70649700 | 0.12686100  |
| C | -3.74055400 | -1.06802200 | -0.00163200 |
| H | -4.96875600 | 0.64313400  | -0.15130600 |
| C | -3.93416400 | 0.31168600  | -0.07981100 |
| H | -3.42233800 | 2.32481200  | -0.10065100 |
| C | -2.97960800 | 1.33094700  | -0.05627600 |
| H | -1.64174100 | 3.51334800  | -0.02545600 |
| C | -0.97681300 | 2.65375000  | -0.00784100 |
| H | 0.80844300  | 3.84349800  | 0.02153300  |
| C | 0.37776900  | 2.84645500  | 0.01388000  |
| N | 2.57161600  | 1.75807600  | 0.03247100  |
| N | -4.83889500 | -1.89148500 | 0.00907800  |
| H | -5.73684000 | -1.51338600 | -0.25598100 |
| H | -4.71516300 | -2.87744000 | -0.16856100 |

**NMe<sub>2</sub>-B4b**

|   |             |             |             |
|---|-------------|-------------|-------------|
| C | -0.68661000 | 1.75523200  | -0.00779100 |
| C | -0.01304900 | 0.45892800  | -0.05382700 |
| C | 1.38521400  | 0.43382900  | -0.01065900 |
| C | 2.15933600  | 1.67649600  | -0.00249400 |
| C | 2.40296700  | -0.59875300 | 0.00775300  |
| C | 3.64378300  | 0.12573500  | 0.00013200  |
| C | 2.43294500  | -2.00253700 | 0.06358600  |
| C | 3.65905200  | -2.66204700 | 0.07665700  |
| C | 4.86867800  | -1.94233700 | 0.04508300  |
| C | 4.87089600  | -0.55332900 | 0.01274400  |
| H | 1.52436100  | -2.59534000 | 0.12121400  |
| H | 3.68157100  | -3.74785600 | 0.12014100  |
| H | 5.81162100  | -2.48355600 | 0.05717900  |
| H | 5.79609900  | 0.01541700  | 0.00376400  |
| H | -0.07492900 | -1.61935000 | -0.39105300 |
| C | -0.72883500 | -0.77405000 | -0.21001400 |
| H | -2.22902500 | -2.17384300 | -0.37453700 |
| C | -2.05352000 | -1.11871000 | -0.20439900 |
| C | -3.22909300 | -0.31168000 | -0.02713100 |
| H | -4.12623000 | 1.60847000  | 0.14792000  |
| C | -3.18028700 | 1.09032700  | 0.05528500  |
| H | -2.35938400 | 2.99296500  | 0.08522200  |
| C | -2.07442100 | 1.94290100  | 0.03374800  |
| H | -0.41002900 | 3.90026600  | 0.03065100  |
| C | 0.11166600  | 2.94684800  | 0.00989400  |
| H | 2.06339600  | 3.83936400  | 0.00733700  |

|   |             |             |             |
|---|-------------|-------------|-------------|
| C | 1.48061600  | 2.92277000  | 0.00212500  |
| N | 3.47609000  | 1.49868900  | -0.00704300 |
| N | -4.44609300 | -0.95171400 | 0.02843400  |
| C | -4.54413400 | -2.40881700 | 0.05477900  |
| H | -5.57435700 | -2.68765600 | 0.27808300  |
| H | -4.27197600 | -2.86283200 | -0.90767800 |
| H | -3.90590400 | -2.83805400 | 0.83485900  |
| C | -5.68466000 | -0.18331000 | 0.08126400  |
| H | -6.53150900 | -0.86817500 | 0.03446100  |
| H | -5.76556500 | 0.39858200  | 1.00922600  |
| H | -5.76138300 | 0.50780300  | -0.76695100 |

### Dimer 1

|   |            |             |             |
|---|------------|-------------|-------------|
| C | 6.16540000 | 2.74710000  | 17.52060000 |
| H | 6.51200000 | 2.24290000  | 16.80720000 |
| C | 6.05620000 | 4.14440000  | 17.34930000 |
| H | 6.38280000 | 4.53510000  | 16.55830000 |
| C | 5.46790000 | 4.97250000  | 18.33430000 |
| H | 5.31040000 | 5.88050000  | 18.15090000 |
| C | 5.11520000 | 4.43320000  | 19.59870000 |
| H | 4.75700000 | 4.95210000  | 20.29580000 |
| C | 5.35870000 | 3.00490000  | 19.71960000 |
| C | 5.08220000 | 2.50690000  | 21.01720000 |
| H | 4.65050000 | 2.99160000  | 21.69880000 |
| C | 5.54560000 | 1.15700000  | 21.14250000 |
| H | 5.58610000 | 0.85510000  | 22.03100000 |
| C | 5.96120000 | 0.17740000  | 20.18680000 |
| C | 6.39240000 | -1.11160000 | 20.53560000 |
| H | 6.35440000 | -1.39490000 | 21.43190000 |
| C | 6.87860000 | -1.97480000 | 19.54660000 |
| H | 7.26910000 | -2.79790000 | 19.77700000 |
| C | 6.77340000 | -1.59630000 | 18.24860000 |
| C | 7.08840000 | -2.42130000 | 17.12690000 |
| H | 7.52400000 | -3.25420000 | 17.09950000 |
| C | 6.53220000 | -1.59220000 | 15.99870000 |
| C | 6.58250000 | -2.17380000 | 14.81560000 |
| H | 7.01500000 | -3.00130000 | 14.70690000 |
| C | 5.97770000 | -1.52830000 | 13.71510000 |
| H | 6.17190000 | -1.98120000 | 12.91450000 |
| C | 5.16070000 | -0.39390000 | 13.46670000 |
| H | 4.89680000 | -0.22690000 | 12.57930000 |
| C | 4.72640000 | 0.48570000  | 14.44970000 |
| H | 4.12290000 | 1.14810000  | 14.16710000 |
| C | 5.06410000 | 0.51350000  | 15.78410000 |

|   |             |             |             |
|---|-------------|-------------|-------------|
| H | 4.67540000  | 1.19060000  | 16.30810000 |
| C | 5.93680000  | -0.37640000 | 16.44030000 |
| C | 6.22120000  | -0.34340000 | 17.87080000 |
| C | 5.94940000  | 0.62390000  | 18.83360000 |
| C | 5.78600000  | 2.05520000  | 18.69900000 |
| C | 14.02040000 | 2.74710000  | 17.41670000 |
| H | 14.36700000 | 2.24290000  | 16.70320000 |
| C | 13.91120000 | 4.14440000  | 17.24540000 |
| H | 14.23780000 | 4.53510000  | 16.45440000 |
| C | 13.32290000 | 4.97250000  | 18.23030000 |
| H | 13.16540000 | 5.88050000  | 18.04700000 |
| C | 12.97020000 | 4.43320000  | 19.49480000 |
| H | 12.61200000 | 4.95210000  | 20.19180000 |
| C | 13.21370000 | 3.00490000  | 19.61570000 |
| C | 12.93720000 | 2.50690000  | 20.91330000 |
| H | 12.50550000 | 2.99160000  | 21.59490000 |
| C | 13.40070000 | 1.15700000  | 21.03850000 |
| H | 13.44110000 | 0.85510000  | 21.92710000 |
| C | 13.81620000 | 0.17740000  | 20.08280000 |
| C | 14.24740000 | -1.11160000 | 20.43170000 |
| H | 14.20940000 | -1.39490000 | 21.32800000 |
| C | 14.73360000 | -1.97480000 | 19.44260000 |
| H | 15.12410000 | -2.79790000 | 19.67310000 |
| C | 14.62840000 | -1.59630000 | 18.14470000 |
| C | 14.94340000 | -2.42130000 | 17.02300000 |
| H | 15.37900000 | -3.25420000 | 16.99560000 |
| C | 14.38720000 | -1.59220000 | 15.89470000 |
| C | 14.43750000 | -2.17380000 | 14.71170000 |
| H | 14.87000000 | -3.00130000 | 14.60300000 |
| C | 13.83270000 | -1.52830000 | 13.61120000 |
| H | 14.02700000 | -1.98120000 | 12.81060000 |
| C | 13.01580000 | -0.39390000 | 13.36280000 |
| H | 12.75180000 | -0.22690000 | 12.47530000 |
| C | 12.58140000 | 0.48570000  | 14.34580000 |
| H | 11.97800000 | 1.14810000  | 14.06320000 |
| C | 12.91910000 | 0.51350000  | 15.68020000 |
| H | 12.53050000 | 1.19060000  | 16.20420000 |
| C | 13.79180000 | -0.37640000 | 16.33630000 |
| C | 14.07620000 | -0.34340000 | 17.76690000 |
| C | 13.80440000 | 0.62390000  | 18.72970000 |
| C | 13.64100000 | 2.05520000  | 18.59510000 |

**Dimer 2**

|   |             |            |             |
|---|-------------|------------|-------------|
| C | 12.71810000 | 5.46850000 | 11.03080000 |
|---|-------------|------------|-------------|

|   |             |             |             |
|---|-------------|-------------|-------------|
| H | 12.31690000 | 6.04560000  | 10.40740000 |
| C | 12.39290000 | 5.60150000  | 12.32910000 |
| H | 11.77500000 | 6.27030000  | 12.56260000 |
| C | 12.90340000 | 4.82710000  | 13.32650000 |
| H | 12.68110000 | 5.01630000  | 14.22050000 |
| C | 13.73450000 | 3.77940000  | 13.04740000 |
| H | 14.08220000 | 3.23070000  | 13.72600000 |
| C | 14.06050000 | 3.55250000  | 11.62670000 |
| C | 14.79330000 | 2.44500000  | 11.35070000 |
| H | 15.15110000 | 1.88610000  | 12.01540000 |
| C | 14.96930000 | 2.21090000  | 9.95730000  |
| H | 15.36950000 | 1.39240000  | 9.72540000  |
| C | 14.61740000 | 3.05750000  | 8.88030000  |
| C | 14.76590000 | 2.64810000  | 7.56100000  |
| H | 15.16090000 | 1.81210000  | 7.39000000  |
| C | 14.36210000 | 3.40810000  | 6.50280000  |
| H | 14.38130000 | 3.07870000  | 5.62190000  |
| C | 13.90970000 | 4.73020000  | 6.79850000  |
| C | 13.59070000 | 5.74900000  | 5.93710000  |
| H | 13.52170000 | 5.67370000  | 5.00360000  |
| C | 13.38180000 | 6.94620000  | 6.69210000  |
| C | 13.05900000 | 8.08780000  | 6.18710000  |
| H | 12.81310000 | 8.06310000  | 5.28040000  |
| C | 13.01730000 | 9.32830000  | 6.76000000  |
| H | 12.75060000 | 10.02720000 | 6.19090000  |
| C | 13.31030000 | 9.69540000  | 8.05180000  |
| H | 13.20790000 | 10.60900000 | 8.24830000  |
| C | 13.72660000 | 8.92000000  | 9.08110000  |
| H | 13.94260000 | 9.37360000  | 9.87610000  |
| C | 13.87670000 | 7.52470000  | 9.11510000  |
| H | 14.17180000 | 7.13970000  | 9.91990000  |
| C | 13.62690000 | 6.67610000  | 8.06200000  |
| C | 13.81150000 | 5.18080000  | 8.12260000  |
| C | 14.01570000 | 4.29600000  | 9.20860000  |
| C | 13.62840000 | 4.50640000  | 10.56530000 |
| C | 10.09290000 | 7.56500000  | 8.47050000  |
| H | 10.43950000 | 8.06920000  | 7.75700000  |
| C | 9.98370000  | 6.16770000  | 8.29920000  |
| H | 10.31030000 | 5.77700000  | 7.50820000  |
| C | 9.39540000  | 5.33960000  | 9.28420000  |
| H | 9.23790000  | 4.43160000  | 9.10080000  |
| C | 9.04270000  | 5.87890000  | 10.54860000 |
| H | 8.68450000  | 5.36000000  | 11.24570000 |
| C | 9.28620000  | 7.30720000  | 10.66950000 |

|   |             |             |             |
|---|-------------|-------------|-------------|
| C | 9.00970000  | 7.80520000  | 11.96710000 |
| H | 8.57800000  | 7.32050000  | 12.64870000 |
| C | 9.47310000  | 9.15510000  | 12.09240000 |
| H | 9.51360000  | 9.45700000  | 12.98090000 |
| C | 9.88870000  | 10.13470000 | 11.13670000 |
| C | 10.31990000 | 11.42370000 | 11.48550000 |
| H | 10.28190000 | 11.70700000 | 12.38180000 |
| C | 10.80610000 | 12.28690000 | 10.49640000 |
| H | 11.19660000 | 13.11000000 | 10.72690000 |
| C | 10.70090000 | 11.90840000 | 9.19850000  |
| C | 11.01590000 | 12.73340000 | 8.07680000  |
| H | 11.45150000 | 13.56630000 | 8.04940000  |
| C | 10.45970000 | 11.90430000 | 6.94860000  |
| C | 10.51000000 | 12.48590000 | 5.76550000  |
| H | 10.94250000 | 13.31340000 | 5.65680000  |
| C | 9.90520000  | 11.84040000 | 4.66500000  |
| H | 10.09940000 | 12.29330000 | 3.86440000  |
| C | 9.08820000  | 10.70600000 | 4.41660000  |
| H | 8.82430000  | 10.53900000 | 3.52920000  |
| C | 8.65390000  | 9.82640000  | 5.39960000  |
| H | 8.05040000  | 9.16400000  | 5.11700000  |
| C | 8.99160000  | 9.79860000  | 6.73400000  |
| H | 8.60300000  | 9.12150000  | 7.25800000  |
| C | 9.86430000  | 10.68850000 | 7.39010000  |
| C | 10.14870000 | 10.65550000 | 8.82070000  |
| C | 9.87690000  | 9.68820000  | 9.78350000  |
| C | 9.71350000  | 8.25690000  | 9.64890000  |

### Dimer 3

|   |             |            |             |
|---|-------------|------------|-------------|
| C | 12.71810000 | 5.46850000 | 11.03080000 |
| H | 12.31690000 | 6.04560000 | 10.40740000 |
| C | 12.39290000 | 5.60150000 | 12.32910000 |
| H | 11.77500000 | 6.27030000 | 12.56260000 |
| C | 12.90340000 | 4.82710000 | 13.32650000 |
| H | 12.68110000 | 5.01630000 | 14.22050000 |
| C | 13.73450000 | 3.77940000 | 13.04740000 |
| H | 14.08220000 | 3.23070000 | 13.72600000 |
| C | 14.06050000 | 3.55250000 | 11.62670000 |
| C | 14.79330000 | 2.44500000 | 11.35070000 |
| H | 15.15110000 | 1.88610000 | 12.01540000 |
| C | 14.96930000 | 2.21090000 | 9.95730000  |
| H | 15.36950000 | 1.39240000 | 9.72540000  |
| C | 14.61740000 | 3.05750000 | 8.88030000  |
| C | 14.76590000 | 2.64810000 | 7.56100000  |

|   |             |             |             |
|---|-------------|-------------|-------------|
| H | 15.16090000 | 1.81210000  | 7.39000000  |
| C | 14.36210000 | 3.40810000  | 6.50280000  |
| H | 14.38130000 | 3.07870000  | 5.62190000  |
| C | 13.90970000 | 4.73020000  | 6.79850000  |
| C | 13.59070000 | 5.74900000  | 5.93710000  |
| H | 13.52170000 | 5.67370000  | 5.00360000  |
| C | 13.38180000 | 6.94620000  | 6.69210000  |
| C | 13.05900000 | 8.08780000  | 6.18710000  |
| H | 12.81310000 | 8.06310000  | 5.28040000  |
| C | 13.01730000 | 9.32830000  | 6.76000000  |
| H | 12.75060000 | 10.02720000 | 6.19090000  |
| C | 13.31030000 | 9.69540000  | 8.05180000  |
| H | 13.20790000 | 10.60900000 | 8.24830000  |
| C | 13.72660000 | 8.92000000  | 9.08110000  |
| H | 13.94260000 | 9.37360000  | 9.87610000  |
| C | 13.87670000 | 7.52470000  | 9.11510000  |
| H | 14.17180000 | 7.13970000  | 9.91990000  |
| C | 13.62690000 | 6.67610000  | 8.06200000  |
| C | 13.81150000 | 5.18080000  | 8.12260000  |
| C | 14.01570000 | 4.29600000  | 9.20860000  |
| C | 13.62840000 | 4.50640000  | 10.56530000 |
| C | 14.02040000 | 2.74710000  | 17.41670000 |
| H | 14.36700000 | 2.24290000  | 16.70320000 |
| C | 13.91120000 | 4.14440000  | 17.24540000 |
| H | 14.23780000 | 4.53510000  | 16.45440000 |
| C | 13.32290000 | 4.97250000  | 18.23030000 |
| H | 13.16540000 | 5.88050000  | 18.04700000 |
| C | 12.97020000 | 4.43320000  | 19.49480000 |
| H | 12.61200000 | 4.95210000  | 20.19180000 |
| C | 13.21370000 | 3.00490000  | 19.61570000 |
| C | 12.93720000 | 2.50690000  | 20.91330000 |
| H | 12.50550000 | 2.99160000  | 21.59490000 |
| C | 13.40070000 | 1.15700000  | 21.03850000 |
| H | 13.44110000 | 0.85510000  | 21.92710000 |
| C | 13.81620000 | 0.17740000  | 20.08280000 |
| C | 14.24740000 | -1.11160000 | 20.43170000 |
| H | 14.20940000 | -1.39490000 | 21.32800000 |
| C | 14.73360000 | -1.97480000 | 19.44260000 |
| H | 15.12410000 | -2.79790000 | 19.67310000 |
| C | 14.62840000 | -1.59630000 | 18.14470000 |
| C | 14.94340000 | -2.42130000 | 17.02300000 |
| H | 15.37900000 | -3.25420000 | 16.99560000 |
| C | 14.38720000 | -1.59220000 | 15.89470000 |
| C | 14.43750000 | -2.17380000 | 14.71170000 |

|   |             |             |             |
|---|-------------|-------------|-------------|
| H | 14.87000000 | -3.00130000 | 14.60300000 |
| C | 13.83270000 | -1.52830000 | 13.61120000 |
| H | 14.02700000 | -1.98120000 | 12.81060000 |
| C | 13.01580000 | -0.39390000 | 13.36280000 |
| H | 12.75180000 | -0.22690000 | 12.47530000 |
| C | 12.58140000 | 0.48570000  | 14.34580000 |
| H | 11.97800000 | 1.14810000  | 14.06320000 |
| C | 12.91910000 | 0.51350000  | 15.68020000 |
| H | 12.53050000 | 1.19060000  | 16.20420000 |
| C | 13.79180000 | -0.37640000 | 16.33630000 |
| C | 14.07620000 | -0.34340000 | 17.76690000 |
| C | 13.80440000 | 0.62390000  | 18.72970000 |
| C | 13.64100000 | 2.05520000  | 18.59510000 |

**Monomer 1**

|   |            |             |             |
|---|------------|-------------|-------------|
| C | 2.23790000 | 7.56500000  | 8.57440000  |
| H | 2.58450000 | 8.06920000  | 7.86100000  |
| C | 2.12870000 | 6.16770000  | 8.40310000  |
| H | 2.45530000 | 5.77700000  | 7.61210000  |
| C | 1.54040000 | 5.33960000  | 9.38810000  |
| H | 1.38290000 | 4.43160000  | 9.20480000  |
| C | 1.18770000 | 5.87890000  | 10.65250000 |
| H | 0.82950000 | 5.36000000  | 11.34960000 |
| C | 1.43120000 | 7.30720000  | 10.77340000 |
| C | 1.15470000 | 7.80520000  | 12.07100000 |
| H | 0.72300000 | 7.32050000  | 12.75270000 |
| C | 1.61810000 | 9.15510000  | 12.19630000 |
| H | 1.65860000 | 9.45700000  | 13.08480000 |
| C | 2.03370000 | 10.13470000 | 11.24060000 |
| C | 2.46490000 | 11.42370000 | 11.58940000 |
| H | 2.42690000 | 11.70700000 | 12.48570000 |
| C | 2.95110000 | 12.28690000 | 10.60040000 |
| H | 3.34160000 | 13.11000000 | 10.83080000 |
| C | 2.84590000 | 11.90840000 | 9.30240000  |
| C | 3.16090000 | 12.73340000 | 8.18070000  |
| H | 3.59650000 | 13.56630000 | 8.15330000  |
| C | 2.60470000 | 11.90430000 | 7.05250000  |
| C | 2.65500000 | 12.48590000 | 5.86950000  |
| H | 3.08750000 | 13.31340000 | 5.76070000  |
| C | 2.05020000 | 11.84040000 | 4.76890000  |
| H | 2.24440000 | 12.29330000 | 3.96830000  |
| C | 1.23320000 | 10.70600000 | 4.52060000  |
| H | 0.96930000 | 10.53900000 | 3.63310000  |
| C | 0.79890000 | 9.82640000  | 5.50350000  |



|   |            |             |            |
|---|------------|-------------|------------|
| H | 0.19540000 | 9.16400000  | 5.22090000 |
| C | 1.13660000 | 9.79860000  | 6.83800000 |
| H | 0.74790000 | 9.12150000  | 7.36190000 |
| C | 2.00930000 | 10.68850000 | 7.49410000 |
| C | 2.29370000 | 10.65550000 | 8.92460000 |
| C | 2.02190000 | 9.68820000  | 9.88740000 |
| C | 1.85850000 | 8.25690000  | 9.75280000 |

Monomer 2

|   |             |             |             |
|---|-------------|-------------|-------------|
| C | 12.71810000 | 5.46850000  | 11.03080000 |
| H | 12.31690000 | 6.04560000  | 10.40740000 |
| C | 12.39290000 | 5.60150000  | 12.32910000 |
| H | 11.77500000 | 6.27030000  | 12.56260000 |
| C | 12.90340000 | 4.82710000  | 13.32650000 |
| H | 12.68110000 | 5.01630000  | 14.22050000 |
| C | 13.73450000 | 3.77940000  | 13.04740000 |
| H | 14.08220000 | 3.23070000  | 13.72600000 |
| C | 14.06050000 | 3.55250000  | 11.62670000 |
| C | 14.79330000 | 2.44500000  | 11.35070000 |
| H | 15.15110000 | 1.88610000  | 12.01540000 |
| C | 14.96930000 | 2.21090000  | 9.95730000  |
| H | 15.36950000 | 1.39240000  | 9.72540000  |
| C | 14.61740000 | 3.05750000  | 8.88030000  |
| C | 14.76590000 | 2.64810000  | 7.56100000  |
| H | 15.16090000 | 1.81210000  | 7.39000000  |
| C | 14.36210000 | 3.40810000  | 6.50280000  |
| H | 14.38130000 | 3.07870000  | 5.62190000  |
| C | 13.90970000 | 4.73020000  | 6.79850000  |
| C | 13.59070000 | 5.74900000  | 5.93710000  |
| H | 13.52170000 | 5.67370000  | 5.00360000  |
| C | 13.38180000 | 6.94620000  | 6.69210000  |
| C | 13.05900000 | 8.08780000  | 6.18710000  |
| H | 12.81310000 | 8.06310000  | 5.28040000  |
| C | 13.01730000 | 9.32830000  | 6.76000000  |
| H | 12.75060000 | 10.02720000 | 6.19090000  |
| C | 13.31030000 | 9.69540000  | 8.05180000  |
| H | 13.20790000 | 10.60900000 | 8.24830000  |
| C | 13.72660000 | 8.92000000  | 9.08110000  |
| H | 13.94260000 | 9.37360000  | 9.87610000  |
| C | 13.87670000 | 7.52470000  | 9.11510000  |
| H | 14.17180000 | 7.13970000  | 9.91990000  |
| C | 13.62690000 | 6.67610000  | 8.06200000  |
| C | 13.81150000 | 5.18080000  | 8.12260000  |
| C | 14.01570000 | 4.29600000  | 9.20860000  |

C

13.62840000 4.50640000 10.56530000

## References

- 1 G. Scalmani and M. J. Frisch, *J. Chem. Phys.*, 2010, **132**, 114110.
- 2 T. Lu optDFTw program v1.0, webpage: <http://sobereva.com/346>.
- 3 S. Ito, T. Minami and M. Nakano, *J. Phys. Chem. C*, 2012, **116**, 19729-19736.
- 4 M. J. G. Peach and D. J. Tozer, *J. Phys. Chem. A*, 2012, **116**, 9783-9789.
- 5 Y.-L. Wang and G.-S. Wu, *Int. J. Quantum Chem.*, 2008, **108**, 430-439.
- 6 B. S. Basel, C. Hetzer, J. Zirzlmeier, D. Thiel, R. Guldi, F. Hampel, A. Kahnt, T. Clark, D. M. Guldi and R. R. Tykwinski, *Chem. Sci.*, 2019, **10**, 3854-3863.
- 7 P. D. Cunningham, S. A. Díaz, B. Yurke, I. L. Medintz and J. S. Melinger, *J. Phys. Chem. B*, 2020, **124**, 8042-8049.
- 8 D. Biermann and W. Schmidt, *J. Am. Chem. Soc.*, 1980, **102**, 3163-3173.
- 9 Y. Tomkiewicz, R. P. Groff and P. Avakian, *J. Chem. Phys.*, 1971, **54**, 4504-4507.
- 10 M. Yasunami, P. W. Yang, Y. Kondo, Y. Noro and K. Takase, *Chem. Lett.*, 1980, **9**, 167-170.
- 11 C. Hansch, A. J. Leo and R. W. Taft, *Chem. Rev.*, 1991, **91**, 165-195.
- 12 C. F.-W. LU Tian, *Acta Chim. Sinica*, 2011, **69**, 2393-2406.
- 13 J. T. Blaskovits, M. Fumanal, S. Vela, Y. Cho and C. Corminboeuf, *Chem. Commun.*, 2022, **58**, 1338-1341.
- 14 K. H. Kim, Y.-K. Han and J. Jung, *Theor. Chem. Acc.*, 2005, **113**, 233-237.
